# Supplementary material for: Changes in the Membrane-Associated Proteins of Exosomes Released from Human Macrophages after Mycobacterium tuberculosis Infection
Source: PubMed Central journal article supplement (PMC5126699; doi:10.1038/srep37975), 2016-11-29
Supplement: srep37975-s1.pdf [file srep37975-s1.pdf]

**Changes in the Membrane-Associated Proteins of Exosomes Released from Human Macrophages after *Mycobacterium tuberculosis* Infection.**

Gustavo Diaz<sup>1</sup>, Lisa M. Wolfe<sup>2</sup>, Nicole A. Kruh-Garcia<sup>1</sup>, and Karen M. Dobos<sup>1\*</sup>.

<sup>1</sup>Department of Microbiology, Immunology and Pathology, Colorado State University, Fort Collins, Colorado, United States of America

<sup>2</sup>Proteomics and Metabolomics Facility, Colorado State University, Fort Collins, Colorado, United States of America

\* Corresponding author

Karen M. Dobos.

E-mail: Karen.Dobos@colostate.edu. Phone: 1+970-491-1891/970-491-2229. Fax: 1+970- 491-1815

1682 Campus delivery, Microbiology, Immunology and Pathology Department. Colorado State University, Fort Collins. Colorado. United States of America.

**Supplementary table S1: List of all proteins identified in exosomes from *Mtb* infected and control cells.** Protein identifications were accepted if they could be established at greater than 99.0% probability to achieve an FDR less than 1.0% and contained at least 2 identified peptides.

Supplementary table S1: List of all proteins identified in exosomes from Mtb infected and control cells

| #  | Identified Proteins (355)                              | Accession Number | Molecular Weight | NORMALIZED SPECTRAL ABUNDANCE FACTOR |           |           |            |            |            |           |           |           | TOTAL SPECTRUM COUNT |            |            |           |           |           | EXCLUSIVE UNIQUE SPECTRUM COUNT |            |            |           |           |           | PERCENTAGE OF COVERAGE |            |            |  |  |  |
|----|--------------------------------------------------------|------------------|------------------|--------------------------------------|-----------|-----------|------------|------------|------------|-----------|-----------|-----------|----------------------|------------|------------|-----------|-----------|-----------|---------------------------------|------------|------------|-----------|-----------|-----------|------------------------|------------|------------|--|--|--|
|    |                                                        |                  |                  | Control 1                            | Control 2 | Control 3 | Infected 1 | Infected 2 | Infected 3 | Control 1 | Control 2 | Control 3 | Infected 1           | Infected 2 | Infected 3 | Control 1 | Control 2 | Control 3 | Infected 1                      | Infected 2 | Infected 3 | Control 1 | Control 2 | Control 3 | Infected 1             | Infected 2 | Infected 3 |  |  |  |
| 1  | Alpha-2-macroglobulin                                  | A2MG_HUMAN       | 163 kDa          | 0.28                                 | 0.49      | 0.50      | 0.26       | 0.23       | 0.28       | 445       | 459       | 483       | 514                  | 378        | 462        | 29        | 16        | 20        | 24                              | 15         | 19         | 20.80%    | 10.70%    | 13.80%    | 14.00%                 | 10.60%     | 13.00%     |  |  |  |
| 2  | Keratin, type I cytoskeletal 10                        | K1C10_HUMAN      | 59 kDa           | 0.85                                 | 0.87      | 0.37      | 0.42       | 0.41       | 0.49       | 540       | 323       | 142       | 334                  | 272        | 320        | 38        | 32        | 23        | 34                              | 32         | 35         | 42.30%    | 39.60%    | 33.20%    | 40.90%                 | 40.10%     | 42.30%     |  |  |  |
| 3  | Complement C3                                          | C03_HUMAN        | 187 kDa          | 0.15                                 | 0.36      | 0.28      | 0.11       | 0.20       | 0.18       | 266       | 385       | 310       | 250                  | 370        | 334        | 15        | 16        | 12        | 16                              | 20         | 14         | 8.00%     | 8.66%     | 5.23%     | 7.40%                  | 11.00%     | 5.83%      |  |  |  |
| 4  | Fibronectin                                            | FINC_HUMAN       | 263 kDa          | 0.10                                 | 0.22      | 0.14      | 0.07       | 0.15       | 0.10       | 250       | 329       | 222       | 233                  | 400        | 276        | 39        | 43        | 32        | 37                              | 57         | 44         | 23.30%    | 23.90%    | 18.50%    | 19.30%                 | 29.50%     | 25.10%     |  |  |  |
| 5  | Keratin, type II cytoskeletal 1                        | K2C1_HUMAN       | 66 kDa           | 0.63                                 | 0.68      | 0.42      | 0.37       | 0.45       | 0.44       | 462       | 293       | 191       | 322                  | 328        | 327        | 41        | 29        | 24        | 38                              | 33         | 38         | 49.70%    | 40.70%    | 40.20%    | 49.40%                 | 50.50%     | 50.50%     |  |  |  |
| 6  | Gelsolin                                               | GELS_HUMAN       | 86 kDa           | 0.19                                 | 0.51      | 0.50      | 0.40       | 0.40       | 0.40       | 159       | 255       | 257       | 429                  | 356        | 347        | 21        | 18        | 19        | 28                              | 27         | 27         | 41.80%    | 32.70%    | 35.00%    | 50.80%                 | 48.20%     | 47.20%     |  |  |  |
| 7  | Talin-1                                                | TLN1_HUMAN       | 270 kDa          | 0.10                                 | 0.13      | 0.12      | 0.12       | 0.16       | 0.17       | 280       | 205       | 206       | 413                  | 448        | 497        | 50        | 33        | 37        | 69                              | 69         | 73         | 29.10%    | 19.30%    | 20.00%    | 36.20%                 | 37.20%     | 37.00%     |  |  |  |
| 8  | Adenylyl cyclase-associated protein 1                  | CAP1_HUMAN       | 52 kDa           | 0.68                                 | 0.33      | 0.58      | 0.55       | 0.48       | 0.62       | 352       | 99        | 183       | 359                  | 259        | 333        | 33        | 18        | 23        | 38                              | 29         | 35         | 46.30%    | 36.60%    | 40.40%    | 46.30%                 | 41.70%     | 46.70%     |  |  |  |
| 9  | Actin, cytoplasmic 2                                   | ACTG_HUMAN       | 42 kDa           | 0.61                                 | 0.78      | 0.78      | 0.60       | 0.68       | 0.50       | 247       | 185       | 194       | 308                  | 288        | 212        | 23        | 19        | 21        | 26                              | 25         | 23         | 50.10%    | 42.40%    | 46.40%    | 53.60%                 | 55.70%     | 48.00%     |  |  |  |
| 10 | Heat shock cognate 71 kDa protein                      | HSP7C_HUMAN      | 71 kDa           | 0.22                                 | 0.24      | 0.36      | 0.38       | 0.46       | 0.49       | 147       | 100       | 152       | 334                  | 335        | 354        | 15        | 14        | 18        | 40                              | 36         | 35         | 25.20%    | 24.00%    | 27.40%    | 44.90%                 | 39.30%     | 44.70%     |  |  |  |
| 11 | Heat shock protein HSP 90-beta                         | HS90B_HUMAN      | 83 kDa           | 0.17                                 | 0.25      | 0.25      | 0.32       | 0.38       | 0.38       | 98        | 82        | 89        | 249                  | 241        | 239        | 22        | 14        | 22        | 36                              | 37         | 31         | 25.70%    | 22.20%    | 26.70%    | 46.00%                 | 39.60%     | 37.20%     |  |  |  |
| 12 | Keratin, type II cytoskeletal 2                        | K22E_HUMAN       | 65 kDa           | 0.60                                 | 0.53      | 0.23      | 0.37       | 0.24       | 0.37       | 419       | 215       | 98        | 323                  | 171        | 266        | 47        | 32        | 16        | 29                              | 27         | 32         | 70.70%    | 58.20%    | 39.60%    | 57.90%                 | 53.10%     | 62.90%     |  |  |  |
| 13 | Pyruvate kinase PKM                                    | KPYM_HUMAN       | 58 kDa           | 0.45                                 | 0.45      | 0.45      | 0.46       | 0.55       | 0.50       | 257       | 152       | 158       | 332                  | 331        | 298        | 22        | 17        | 18        | 37                              | 27         | 27         | 38.40%    | 35.00%    | 35.00%    | 48.80%                 | 37.90%     | 41.60%     |  |  |  |
| 14 | Inter-alpha-trypsin inhibitor heavy chain H2           | A0A087WTE1_HUMAN | 107 kDa          | 0.05                                 | 0.30      | 0.25      | 0.09       | 0.21       | 0.16       | 56        | 179       | 153       | 114                  | 226        | 169        | 10        | 13        | 14        | 11                              | 14         | 14         | 9.31%     | 10.30%    | 10.30%    | 9.42%                  | 10.30%     | 12.00%     |  |  |  |
| 15 | Keratin, type I cytoskeletal 9                         | K1C9_HUMAN       | 62 kDa           | 0.55                                 | 0.34      | 0.26      | 0.32       | 0.44       | 0.30       | 369       | 133       | 105       | 270                  | 309        | 209        | 27        | 11        | 11        | 20                              | 21         | 17         | 45.70%    | 28.90%    | 37.40%    | 47.50%                 | 43.50%     | 43.80%     |  |  |  |
| 16 | Serum albumin                                          | A0A0C4DGB6_HUMAN | 69 kDa           | 0.17                                 | 0.33      | 0.29      | 0.10       | 0.22       | 0.15       | 110       | 128       | 116       | 80                   | 147        | 105        | 3         | 3         | 3         | 3                               | 4          | 4          | 2.48%     | 2.48%     | 2.48%     | 2.48%                  | 3.81%      | 3.81%      |  |  |  |
| 17 | Apolipoprotein E                                       | APOE_HUMAN       | 36 kDa           | 0.52                                 | 1.11      | 0.85      | 0.30       | 0.54       | 0.47       | 180       | 223       | 178       | 131                  | 193        | 168        | 21        | 26        | 22        | 18                              | 21         | 24         | 52.70%    | 61.20%    | 57.40%    | 53.60%                 | 55.80%     | 56.80%     |  |  |  |
| 18 | Perioctin                                              | POSTN_HUMAN      | 93 kDa           | 0.06                                 | 0.29      | 0.27      | 0.13       | 0.19       | 0.21       | 57        | 152       | 149       | 150                  | 179        | 195        | 7         | 11        | 13        | 16                              | 15         | 17         | 9.21%     | 14.00%    | 17.20%    | 18.50%                 | 17.30%     | 19.90%     |  |  |  |
| 19 | Tubulin beta chain                                     | TBB5_HUMAN       | 50 kDa           | 0.30                                 | 0.26      | 0.41      | 0.35       | 0.41       | 0.38       | 135       | 68        | 113       | 207                  | 195        | 184        | 22        | 11        | 21        | 31                              | 25         | 25         | 60.40%    | 31.30%    | 58.30%    | 67.60%                 | 63.50%     | 60.10%     |  |  |  |
| 20 | Complement C4-4                                        | C04A_HUMAN       | 193 kDa          | 0.06                                 | 0.08      | 0.08      | 0.05       | 0.06       | 0.06       | 123       | 86        | 89        | 117                  | 112        | 121        | 11        | 10        | 11        | 10                              | 10         | 10         | 4.42%     | 4.42%     | 4.42%     | 4.42%                  | 4.42%      | 4.42%      |  |  |  |
| 21 | Alpha-actinin-4                                        | ACTN4_HUMAN      | 105 kDa          | 0.15                                 | 0.12      | 0.10      | 0.19       | 0.13       | 0.16       | 145       | 69        | 58        | 221                  | 136        | 159        | 27        | 11        | 12        | 39                              | 23         | 27         | 34.80%    | 17.60%    | 17.10%    | 46.40%                 | 31.80%     | 33.80%     |  |  |  |
| 22 | Alpha-enolase                                          | ENOA_HUMAN       | 47 kDa           | 0.14                                 | 0.30      | 0.30      | 0.29       | 0.42       | 0.33       | 64        | 83        | 87        | 169                  | 208        | 161        | 10        | 11        | 10        | 18                              | 19         | 17         | 31.80%    | 28.60%    | 27.20%    | 42.60%                 | 39.40%     | 39.40%     |  |  |  |
| 23 | Coagulation factor V                                   | A0A0A0MRJ7_HUMAN | 252 kDa          | 0.06                                 | 0.04      | 0.04      | 0.05       | 0.02       | 0.03       | 142       | 57        | 59        | 147                  | 50         | 72         | 13        | 5         | 6         | 15                              | 9          | 9          | 4.80%     | 2.92%     | 2.92%     | 5.34%                  | 3.54%      | 3.41%      |  |  |  |
| 24 | Prolow-density lipoprotein receptor-related protein 1  | LRP1_HUMAN       | 505 kDa          | 0.02                                 | 0.02      | 0.02      | 0.02       | 0.01       | 0.02       | 104       | 47        | 68        | 120                  | 74         | 110        | 25        | 10        | 14        | 24                              | 16         | 17         | 7.28%     | 2.75%     | 3.85%     | 5.92%                  | 4.09%      | 4.40%      |  |  |  |
| 25 | Myosin-9                                               | MYH9_HUMAN       | 227 kDa          | 0.06                                 | 0.00      | 0.02      | 0.12       | 0.02       | 0.08       | 135       | 0         | 26        | 324                  | 49         | 172        | 36        | 0         | 9         | 61                              | 17         | 37         | 21.00%    | 0         | 6.94%     | 28.90%                 | 12.30%     | 22.60%     |  |  |  |
| 26 | Inter-alpha-trypsin inhibitor heavy chain H3           | ITH3_HUMAN       | 100 kDa          | 0.02                                 | 0.14      | 0.10      | 0.03       | 0.10       | 0.07       | 16        | 79        | 59        | 33                   | 104        | 71         | 5         | 8         | 8         | 7                               | 10         | 11         | 2.92%     | 6.63%     | 6.63%     | 3.93%                  | 7.53%      | 8.88%      |  |  |  |
| 27 | Vimentin                                               | VIME_HUMAN       | 54 kDa           | 0.08                                 | 0.07      | 0.07      | 0.23       | 0.31       | 0.21       | 40        | 20        | 21        | 149                  | 162        | 111        | 10        | 3         | 5         | 27                              | 23         | 21         | 24.20%    | 7.30%     | 11.40%    | 50.00%                 | 44.80%     | 41.40%     |  |  |  |
| 28 | Alpha-fetoprotein                                      | J3KMX3_HUMAN     | 70 kDa           | 0.06                                 | 0.28      | 0.21      | 0.04       | 0.16       | 0.15       | 39        | 110       | 87        | 33                   | 110        | 106        | 3         | 6         | 3         | 6                               | 3          | 5          | 6.27%     | 9.16%     | 9.16%     | 6.27%                  | 9.16%      | 7.88%      |  |  |  |
| 29 | Hemoglobin subunit alpha                               | HBA_HUMAN        | 15 kDa           | 0.32                                 | 0.82      | 0.96      | 0.43       | 0.50       | 0.59       | 50        | 74        | 90        | 84                   | 81         | 94         | 7         | 7         | 7         | 7                               | 7          | 7          | 34.50%    | 34.50%    | 34.50%    | 34.50%                 | 34.50%     | 34.50%     |  |  |  |
| 30 | Heat shock protein HSP 90-alpha                        | HS90A_HUMAN      | 85 kDa           | 0.03                                 | 0.11      | 0.10      | 0.11       | 0.14       | 0.14       | 68        | 85        | 90        | 208                  | 217        | 215        | 6         | 7         | 9         | 17                              | 17         | 16         | 20.10%    | 20.50%    | 23.60%    | 41.00%                 | 42.60%     | 37.30%     |  |  |  |
| 31 | Tubulin alpha-1C chain                                 | FSH5D3_HUMAN     | 58 kDa           | 0.16                                 | 0.14      | 0.20      | 0.16       | 0.16       | 0.14       | 89        | 46        | 68        | 116                  | 93         | 83         | 11        | 7         | 6         | 12                              | 9          | 11         | 24.50%    | 17.50%    | 15.20%    | 24.50%                 | 20.60%     | 22.50%     |  |  |  |
| 32 | Apolipoprotein B-100                                   | APOB_HUMAN       | 516 kDa          | 0.02                                 | 0.02      | 0.02      | 0.01       | 0.01       | 0.02       | 89        | 46        | 56        | 58                   | 58         | 89         | 13        | 8         | 11        | 12                              | 11         | 11         | 2.30%     | 2.04%     | 2.50%     | 2.30%                  | 2.30%      | 2.30%      |  |  |  |
| 33 | Alpha-actinin-1                                        | ACTN1_HUMAN      | 103 kDa          | 0.12                                 | 0.04      | 0.05      | 0.16       | 0.07       | 0.10       | 168       | 51        | 52        | 262                  | 105        | 154        | 21        | 3         | 6         | 34                              | 18         | 23         | 34.10%    | 10.10%    | 11.20%    | 45.40%                 | 34.50%     | 34.20%     |  |  |  |
| 34 | Glyceraldehyde-3-phosphate dehydrogenase               | G3P_HUMAN        | 36 kDa           | 0.18                                 | 0.20      | 0.22      | 0.32       | 0.29       | 0.27       | 65        | 43        | 49        | 144                  | 110        | 103        | 10        | 6         | 7         | 17                              | 14         | 13         | 38.20%    | 34.60%    | 41.20%    | 52.80%                 | 46.60%     | 46.30%     |  |  |  |
| 35 | Thrombospondin-1                                       | TSP1_HUMAN       | 129 kDa          | 0.02                                 | 0.10      | 0.11      | 0.02       | 0.08       | 0.08       | 24        | 75        | 86        | 30                   | 105        | 101        | 7         | 11        | 14        | 6                               | 17         | 14         | 7.78%     | 12.20%    | 14.80%    | 7.09%                  | 16.70%     | 15.50%     |  |  |  |
| 36 | Putative elongation factor 1- alpha-like 3             | EF1A3_HUMAN      | 50 kDa           | 0.13                                 | 0.15      | 0.22      | 0.17       | 0.20       | 0.18       | 63        | 44        | 68        | 108                  | 103        | 93         | 10        | 6         | 7         | 14                              | 11         | 13         | 25.10%    | 9.74%     | 12.30%    | 27.10%                 | 19.90%     | 27.10%     |  |  |  |
| 37 | Chitinase-3-like protein 1                             | CH3L1_HUMAN      | 43 kDa           | 0.12                                 | 0.43      | 0.28      | 0.10       | 0.23       | 0.11       | 52        | 104       | 72        | 51                   | 98         | 49         | 11        | 12        | 12        | 9                               | 14         | 9          | 32.10%    | 29.20%    | 29.20%    | 29.80%                 | 37.30%     | 29.20%     |  |  |  |
| 38 | Vinculin                                               | VINC_HUMAN       | 124 kDa          | 0.04                                 | 0.11      | 0.09      | 0.08       | 0.08       | 0.09       | 48        | 81        | 65        | 125                  | 109        | 113        | 12        | 12        | 12        | 22                              | 18         | 20         | 14.40%    | 13.10%    | 14.10%    | 24.20%                 | 17.70%     | 23.20%     |  |  |  |
| 39 | Moesin                                                 | MOES_HUMAN       | 68 kDa           | 0.04                                 | 0.07      | 0.07      | 0.13       | 0.15       | 0.17       | 27        | 27        | 26        | 103                  | 101        | 108        | 8         | 3         | 5         | 19                              | 15         | 14         | 18.00%    | 5.20%     | 10.90%    | 26.90%                 | 19.60%     | 19.60%     |  |  |  |
| 40 | Transforming growth factor-beta- induced protein ig-h3 | BGH3_HUMAN       | 75 kDa           | 0.15                                 | 0.13      | 0.11      | 0.06       | 0.07       | 0.06       | 108       | 57        | 48        | 53                   | 51         | 46         | 12        | 12        | 11        | 10                              | 11         | 8          | 20.60%    | 18.20%    | 18.20%    | 18.20%                 | 19.20%     | 9.81%      |  |  |  |
| 41 | Pigment epithelium-derived factor                      | PDF_HUMAN        | 46 kDa           | 0.06                                 | 0.27      | 0.29      | 0.09       | 0.18       | 0.14       | 28        | 71        | 79        | 50                   | 86         | 68         | 4         | 6         | 6         | 5                               | 5          | 6          | 9.33%     | 12.20%    | 12.20%    | 12.20%                 | 12.20%     | 12.20%     |  |  |  |
| 42 | Cathepsin D                                            | CATD_HUMAN       | 45 kDa           | 0.24                                 | 0.21      | 0.15      | 0.17       | 0.17       | 0.19       | 109       | 55        | 41        | 97                   | 79         | 88         | 13        | 10        | 9         | 14                              | 11         | 13         | 24.50%    | 24.30%    | 24.30%    | 24.50%                 | 24.30%     | 24.50%     |  |  |  |
| 43 | Complement C5                                          | C05_HUMAN        | 188 kDa          | 0.05                                 | 0.01      | 0.02      | 0.02       | 0.01       | 0.01       | 84        | 12        | 18        | 53                   | 15         | 18         | 7         | 2         | 3         | 8                               | 4          | 2          | 3.82%     | 2.33%     | 2.92%     | 4.89%                  | 2.98%      | 2.21%      |  |  |  |
| 44 | Prelamin-A/C                                           | LMNA_HUMAN       | 74 kDa           | 0.07                                 | 0.00      | 0.02      | 0.14       | 0.04       | 0.09       | 53        | 0         | 10        | 126                  | 32         | 69         | 11        | 0         | 2         | 23                              | 7          | 16         | 18.70%    | 0         | 3.77%     | 33.30%                 | 12.00%     | 28.60%     |  |  |  |
|    |                                                        |                  |                  |                                      |           |           |            |            |            |           |           |           |                      |            |            |           |           |           |                                 |            |            |           |           |           |                        |            |            |  |  |  |

|     |                                                   |                   |         |      |      |      |      |      |      |     |     |     |     |     |     |    |    |   |    |    |    |        |        |        |        |        |        |
|-----|---------------------------------------------------|-------------------|---------|------|------|------|------|------|------|-----|-----|-----|-----|-----|-----|----|----|---|----|----|----|--------|--------|--------|--------|--------|--------|
| 55  | Fibulin-1                                         | FBLN1_HUMAN       | 77 kDa  | 0.02 | 0.05 | 0.06 | 0.03 | 0.04 | 0.05 | 19  | 21  | 28  | 28  | 28  | 40  | 4  | 3  | 3 | 4  | 4  | 5  | 7.25%  | 3.27%  | 3.27%  | 6.40%  | 4.41%  | 5.83%  |
| 56  | Protocadherin Fat 4                               | FAT4_HUMAN        | 543 kDa | 0.00 | 0.00 | 0.00 | 0.00 | 0.00 | 0.00 | 0   | 0   | 0   | 6   | 0   | 13  | 0  | 0  | 0 | 3  | 0  | 5  | 0      | 0      | 0      | 1.10%  | 0      | 1.87%  |
| 57  | Adenosylhomocysteinase                            | SAHH_HUMAN        | 48 kDa  | 0.06 | 0.08 | 0.13 | 0.10 | 0.12 | 0.11 | 30  | 22  | 36  | 57  | 59  | 54  | 5  | 4  | 7 | 7  | 8  | 5  | 13.40% | 11.10% | 19.00% | 19.40% | 18.80% | 14.60% |
| 58  | Coronin-1A                                        | COR1A_HUMAN       | 51 kDa  | 0.09 | 0.10 | 0.10 | 0.11 | 0.12 | 0.09 | 47  | 30  | 30  | 67  | 62  | 49  | 4  | 3  | 3 | 6  | 3  | 3  | 13.70% | 11.90% | 11.90% | 17.80% | 11.90% | 11.90% |
| 59  | Fructose-bisphosphate aldolase A                  | ALDOA_HUMAN (+1)  | 39 kDa  | 0.03 | 0.13 | 0.07 | 0.06 | 0.16 | 0.11 | 11  | 30  | 18  | 30  | 65  | 43  | 4  | 6  | 7 | 7  | 7  | 7  | 11.00% | 22.50% | 23.90% | 15.90% | 24.20% | 21.70% |
| 60  | Keratin, type II cytoskeletal 5                   | K2C5_HUMAN        | 62 kDa  | 0.10 | 0.07 | 0.00 | 0.04 | 0.02 | 0.06 | 108 | 53  | 0   | 57  | 40  | 60  | 11 | 5  | 0 | 6  | 4  | 5  | 22.20% | 11.40% | 0      | 13.10% | 12.90% | 13.10% |
|     | Ubiquitin-like modifier-activating enzyme 1       | UBA1_HUMAN        | 118 kDa | 0.02 | 0.00 | 0.00 | 0.07 | 0.04 | 0.06 | 18  | 0   | 3   | 103 | 47  | 69  | 5  | 0  | 2 | 16 | 9  | 15 | 6.52%  | 0      | 3.40%  | 22.70% | 12.10% | 19.30% |
| 62  | Matrix metalloproteinase-9                        | MMP9_HUMAN        | 78 kDa  | 0.01 | 0.16 | 0.06 | 0.02 | 0.08 | 0.06 | 10  | 70  | 29  | 22  | 62  | 45  | 2  | 10 | 7 | 4  | 11 | 9  | 3.68%  | 19.90% | 12.40% | 7.50%  | 18.00% | 17.00% |
| 63  | Plastin-2                                         | PLSL_HUMAN        | 70 kDa  | 0.02 | 0.08 | 0.03 | 0.05 | 0.15 | 0.05 | 14  | 30  | 12  | 46  | 105 | 35  | 3  | 7  | 3 | 13 | 17 | 10 | 7.18%  | 15.20% | 7.18%  | 25.50% | 31.70% | 24.10% |
|     | Transitional endoplasmic reticulum ATPase         | TERA_HUMAN        | 89 kDa  | 0.07 | 0.00 | 0.02 | 0.12 | 0.00 | 0.06 | 61  | 0   | 10  | 130 | 3   | 54  | 17 | 0  | 3 | 23 | 2  | 10 | 23.10% | 0      | 5.33%  | 31.30% | 3.72%  | 16.70% |
| 64  | Fatty acid synthase                               | FAS_HUMAN         | 273 kDa | 0.03 | 0.00 | 0.00 | 0.02 | 0.01 | 0.02 | 75  | 0   | 0   | 70  | 17  | 63  | 17 | 0  | 0 | 15 | 7  | 13 | 10.40% | 0      | 0      | 9.80%  | 4.94%  | 8.20%  |
| 66  | Catalase                                          | CATA_HUMAN        | 60 kDa  | 0.14 | 0.04 | 0.08 | 0.09 | 0.05 | 0.08 | 82  | 15  | 28  | 65  | 28  | 50  | 8  | 3  | 4 | 9  | 4  | 7  | 21.30% | 7.59%  | 10.40% | 24.30% | 13.30% | 21.30% |
| 67  | Proteasome subunit alpha type-7                   | PSA7_HUMAN        | 28 kDa  | 0.18 | 0.10 | 0.14 | 0.13 | 0.09 | 0.09 | 48  | 16  | 23  | 43  | 26  | 25  | 8  | 4  | 4 | 7  | 6  | 4  | 44.00% | 25.00% | 25.00% | 36.30% | 36.30% | 25.00% |
| 68  | Claathrin heavy chain                             | A0A087VVQ6_HUMAN  | 192 kDa | 0.05 | 0.00 | 0.00 | 0.03 | 0.01 | 0.03 | 97  | 0   | 0   | 68  | 10  | 48  | 25 | 0  | 0 | 17 | 5  | 13 | 20.10% | 0      | 0      | 14.80% | 3.28%  | 11.10% |
| 69  | Ceruloplasmin                                     | CERU_HUMAN        | 122 kDa | 0.03 | 0.04 | 0.03 | 0.05 | 0.02 | 0.02 | 31  | 28  | 22  | 68  | 26  | 24  | 7  | 5  | 4 | 9  | 5  | 5  | 6.85%  | 5.07%  | 4.69%  | 7.79%  | 5.07%  | 5.73%  |
| 70  | Lumican                                           | LUM_HUMAN         | 38 kDa  | 0.00 | 0.00 | 0.27 | 0.00 | 0.00 | 0.13 | 0   | 0   | 61  | 0   | 0   | 50  | 0  | 0  | 3 | 0  | 0  | 3  | 0      | 0      | 8.28%  | 0      | 8.28%  |        |
| 71  | Vitronectin                                       | VTNC_HUMAN        | 54 kDa  | 0.07 | 0.12 | 0.14 | 0.07 | 0.06 | 0.07 | 38  | 37  | 45  | 48  | 31  | 40  | 3  | 3  | 4 | 3  | 4  | 4  | 5.02%  | 5.02%  | 6.69%  | 5.02%  | 6.69%  | 6.69%  |
| 72  | Pregnancy zone protein                            | PZP_HUMAN         | 164 kDa | 0.01 | 0.02 | 0.02 | 0.02 | 0.00 | 0.00 | 145 | 134 | 133 | 189 | 0   | 0   | 2  | 2  | 2 | 2  | 0  | 0  | 4.72%  | 3.85%  | 3.85%  | 4.72%  | 0      | 0      |
| 73  | Lactotransferrin                                  | TRFL_HUMAN        | 78 kDa  | 0.03 | 0.05 | 0.05 | 0.02 | 0.04 | 0.03 | 21  | 21  | 25  | 20  | 36  | 27  | 2  | 2  | 3 | 2  | 3  | 2  | 2.54%  | 2.54%  | 4.37%  | 2.54%  | 4.37%  | 2.54%  |
| 74  | T-complex protein 1 subunit zeta                  | TCPZ_HUMAN        | 58 kDa  | 0.08 | 0.00 | 0.02 | 0.09 | 0.08 | 0.09 | 48  | 0   | 6   | 66  | 48  | 55  | 11 | 0  | 4 | 13 | 8  | 9  | 24.90% | 0      | 9.04%  | 27.30% | 20.20% | 22.60% |
| 75  | 14-3-3 protein zeta/delta                         | 1433Z_HUMAN       | 28 kDa  | 0.17 | 0.25 | 0.33 | 0.13 | 0.18 | 0.16 | 44  | 39  | 52  | 45  | 51  | 44  | 6  | 5  | 6 | 6  | 6  | 6  | 24.90% | 24.90% | 24.90% | 24.30% | 24.90% | 24.90% |
| 76  | T-complex protein 1 subunit beta                  | TCPB_HUMAN        | 57 kDa  | 0.10 | 0.00 | 0.02 | 0.08 | 0.06 | 0.07 | 57  | 0   | 6   | 55  | 36  | 40  | 12 | 0  | 3 | 9  | 6  | 6  | 31.40% | 0      | 7.48%  | 22.20% | 13.30% | 14.60% |
| 77  | ITIH4 protein                                     | BTZKJ8_HUMAN (+1) | 104 kDa | 0.00 | 0.00 | 0.00 | 0.01 | 0.01 | 0.01 | 0   | 0   | 0   | 8   | 15  | 12  | 0  | 0  | 0 | 3  | 4  | 3  | 0      | 0      | 0      | 2.46%  | 2.46%  | 2.46%  |
| 78  | Phosphoglycerate kinase 1                         | PGK1_HUMAN        | 45 kDa  | 0.07 | 0.05 | 0.07 | 0.07 | 0.07 | 0.08 | 33  | 13  | 19  | 38  | 31  | 36  | 6  | 4  | 4 | 6  | 6  | 7  | 20.90% | 15.30% | 15.30% | 20.90% | 21.60% | 23.30% |
|     | Actin-related protein 2/3 complex subunit 2       | ARPC2_HUMAN       | 34 kDa  | 0.17 | 0.03 | 0.04 | 0.10 | 0.06 | 0.05 | 56  | 6   | 7   | 41  | 21  | 17  | 8  | 2  | 2 | 9  | 4  | 5  | 30.70% | 16.00% | 16.00% | 31.70% | 22.30% | 19.00% |
| 80  | Collagen alpha-1(I) chain                         | CO1A1_HUMAN       | 139 kDa | 0.01 | 0.03 | 0.04 | 0.01 | 0.03 | 0.02 | 9   | 25  | 34  | 15  | 21  | 49  | 33 | 4  | 5 | 3  | 5  | 4  | 2.39%  | 2.39%  | 3.28%  | 2.39%  | 3.28%  | 2.39%  |
| 81  | Transketolase                                     | TKT_HUMAN         | 68 kDa  | 0.00 | 0.02 | 0.03 | 0.06 | 0.10 | 0.08 | 0   | 6   | 12  | 51  | 74  | 57  | 0  | 3  | 4 | 8  | 8  | 7  | 0      | 8.03%  | 10.80% | 13.00% | 13.00% | 13.00% |
| 82  | Eukaryotic initiation factor 4A-1                 | IF4A1_HUMAN       | 46 kDa  | 0.06 | 0.00 | 0.06 | 0.14 | 0.09 | 0.12 | 25  | 0   | 15  | 76  | 42  | 53  | 4  | 0  | 5 | 12 | 9  | 9  | 13.30% | 0      | 14.30% | 33.50% | 26.60% | 25.40% |
|     | T-complex protein 1 subunit epsilon               | TCPE_HUMAN        | 60 kDa  | 0.08 | 0.00 | 0.03 | 0.05 | 0.07 | 0.06 | 46  | 0   | 9   | 38  | 41  | 36  | 6  | 0  | 3 | 6  | 5  | 5  | 15.30% | 0      | 7.39%  | 14.20% | 12.40% | 12.00% |
| 84  | Nucleolin                                         | NUCL_HUMAN        | 77 kDa  | 0.02 | 0.00 | 0.00 | 0.05 | 0.07 | 0.07 | 17  | 0   | 0   | 52  | 53  | 56  | 4  | 0  | 0 | 9  | 7  | 8  | 6.76%  | 0      | 0      | 15.90% | 12.70% | 13.10% |
|     | Rab GDP dissociation inhibitor beta               | GDIB_HUMAN        | 51 kDa  | 0.02 | 0.11 | 0.14 | 0.07 | 0.08 | 0.09 | 12  | 30  | 40  | 41  | 38  | 47  | 3  | 5  | 5 | 6  | 6  | 6  | 11.00% | 15.30% | 15.30% | 18.00% | 19.80% | 15.50% |
| 86  | Tubulin beta-4B chain                             | TB4B_HUMAN        | 50 kDa  | 0.08 | 0.04 | 0.10 | 0.10 | 0.09 | 0.09 | 141 | 71  | 117 | 206 | 188 | 179 | 6  | 4  | 6 | 7  | 6  | 8  | 56.90% | 34.60% | 58.20% | 67.40% | 63.40% | 60.00% |
| 87  | Proteasome subunit alpha type 8                   | A0A024RA52_HUMAN  | 26 kDa  | 0.30 | 0.09 | 0.15 | 0.21 | 0.11 | 0.06 | 77  | 13  | 23  | 67  | 28  | 16  | 8  | 2  | 3 | 7  | 5  | 3  | 37.20% | 17.10% | 17.10% | 32.90% | 17.50% | 17.10% |
| 88  | Histone H2A type 1-B/E                            | H2A1B_HUMAN (+2)  | 14 kDa  | 0.31 | 0.00 | 0.30 | 0.40 | 0.12 | 0.37 | 44  | 0   | 26  | 71  | 18  | 54  | 4  | 0  | 4 | 5  | 2  | 5  | 43.80% | 0      | 43.80% | 43.80% | 36.90% | 43.80% |
| 89  | Carbonic anhydrase 2                              | CAH2_HUMAN        | 29 kDa  | 0.05 | 0.22 | 0.12 | 0.08 | 0.19 | 0.09 | 13  | 36  | 20  | 28  | 57  | 25  | 3  | 6  | 3 | 4  | 9  | 3  | 16.90% | 31.20% | 16.90% | 16.90% | 36.20% | 16.90% |
| 90  | Collagen alpha-2(I) chain                         | A0A087WTA8_HUMAN  | 129 kDa | 0.00 | 0.02 | 0.02 | 0.00 | 0.02 | 0.01 | 0   | 20  | 18  | 0   | 28  | 18  | 0  | 2  | 2 | 0  | 5  | 3  | 0      | 2.20%  | 2.20%  | 0      | 4.25%  | 2.86%  |
| 91  | Nucleophosmin                                     | NPM_HUMAN         | 33 kDa  | 0.15 | 0.00 | 0.00 | 0.11 | 0.12 | 0.07 | 47  | 0   | 0   | 45  | 40  | 23  | 8  | 0  | 0 | 8  | 6  | 5  | 24.10% | 0      | 0      | 24.50% | 19.70% | 10.20% |
| 92  | Heat shock 70 kDa protein 1B                      | A0A0G2JIW1_HUMAN  | 70 kDa  | 0.04 | 0.00 | 0.02 | 0.05 | 0.02 | 0.04 | 51  | 0   | 24  | 65  | 33  | 43  | 3  | 0  | 2 | 12 | 5  | 5  | 11.10% | 0      | 8.57%  | 23.80% | 14.00% | 12.50% |
| 93  | Fermitin family homolog 3                         | URP2_HUMAN        | 76 kDa  | 0.01 | 0.00 | 0.00 | 0.06 | 0.03 | 0.05 | 5   | 0   | 0   | 53  | 25  | 34  | 4  | 0  | 0 | 8  | 6  | 8  | 8.70%  | 0      | 0      | 23.20% | 14.70% | 22.20% |
| 94  | Proteasome subunit alpha type-1                   | PSA1_HUMAN        | 30 kDa  | 0.22 | 0.00 | 0.00 | 0.13 | 0.02 | 0.05 | 62  | 0   | 0   | 46  | 5   | 14  | 12 | 0  | 0 | 9  | 3  | 5  | 39.90% | 0      | 0      | 36.50% | 18.60% | 25.10% |
| 95  | Complement component C9                           | CO9_HUMAN         | 63 kDa  | 0.05 | 0.09 | 0.08 | 0.04 | 0.05 | 0.05 | 28  | 32  | 30  | 34  | 31  | 33  | 2  | 2  | 2 | 2  | 2  | 3  | 3.76%  | 3.76%  | 3.76%  | 3.76%  | 3.76%  | 4.11%  |
|     | UTP--glucose-1-phosphate uridylyltransferase      | UGPA_HUMAN        | 57 kDa  | 0.06 | 0.01 | 0.00 | 0.04 | 0.00 | 0.03 | 31  | 3   | 0   | 26  | 0   | 15  | 7  | 2  | 0 | 6  | 0  | 4  | 17.50% | 6.69%  | 0      | 20.30% | 0      | 12.60% |
| 97  | DNA-dependent protein kinase catalytic subunit    | PRKDC_HUMAN       | 469 kDa | 0.00 | 0.00 | 0.00 | 0.00 | 0.00 | 0.00 | 2   | 0   | 0   | 0   | 0   | 0   | 2  | 0  | 0 | 0  | 0  | 0  | 1.07%  | 0      | 0      | 0      | 0      | 0      |
|     | 6-phosphogluconate dehydrogenase, decarboxylating | 6PGD_HUMAN        | 53 kDa  | 0.01 | 0.00 | 0.05 | 0.07 | 0.08 | 0.08 | 7   | 0   | 16  | 46  | 44  | 41  | 4  | 0  | 5 | 6  | 6  | 6  | 9.11%  | 0      | 13.30% | 16.80% | 16.80% | 16.80% |
|     | Dihydropyrimidinase-related protein 2             | DPYL2_HUMAN       | 62 kDa  | 0.04 | 0.00 | 0.01 | 0.08 | 0.01 | 0.02 | 24  | 0   | 2   | 60  | 6   | 15  | 5  | 0  | 2 | 12 | 2  | 5  | 17.80% | 0      | 8.22%  | 29.20% | 8.22%  | 17.80% |
|     | Heterogeneous nuclear ribonucleoprotein K         | HNRPK_HUMAN       | 51 kDa  | 0.01 | 0.00 | 0.00 | 0.09 | 0.07 | 0.07 | 4   | 0   | 0   | 54  | 35  | 38  | 2  | 0  | 0 | 5  | 5  | 5  | 6.05%  | 0      | 0      | 17.70% | 17.30% | 14.50% |
| 101 | Argininosuccinate synthase                        | ASSY_HUMAN        | 47 kDa  | 0.00 | 0.07 | 0.14 | 0.02 | 0.09 | 0.06 | 0   | 19  | 39  | 10  | 42  | 26  | 0  | 3  | 5 | 3  | 6  | 6  | 0      | 10.40% | 12.40% | 10.70% | 15.50% | 12.40% |
| 102 | Epididymis luminal protein 189                    | QSHYB6_HUMAN      | 27 kDa  | 0.06 | 0.09 | 0.10 | 0.05 | 0.16 | 0.05 | 14  | 13  | 16  | 15  | 41  | 12  | 2  | 2  | 4 | 2  | 7  | 3  | 6.47%  | 6.47%  | 14.20% | 6.47%  | 19.00% | 11.20% |
| 103 | ATP-citrate synthase                              | ACLY_HUMAN        | 121 kDa | 0.03 | 0.00 | 0.00 | 0.03 | 0.00 | 0.01 | 35  | 0   | 0   | 38  | 3   | 9   | 12 | 0  | 0 | 7  | 2  | 3  | 13.50% | 0      | 0      | 9.17%  | 3.36%  | 3.54%  |
| 104 | Fructose-bisphosphate aldolase                    | A8MVZ9_HUMAN      | 36 kDa  | 0.04 | 0.11 | 0.11 | 0.04 | 0.09 | 0.08 | 13  | 23  | 24  | 20  | 36  | 29  | 3  | 3  | 4 | 3  | 4  | 3  | 7.74%  | 7.74%  | 11.90% | 7.74%  | 11.90% | 7.74%  |
| 105 | Filamin-A                                         | QSHY54_HUMAN      | 277 kDa | 0.00 | 0.00 | 0.00 | 0.00 | 0.00 | 0.02 | 5   | 0   | 8   | 10  | 12  | 45  | 3  | 0  | 6 | 4  | 4  | 10 | 1.96%  | 0      | 4.41%  | 2.61%  | 2.42%  | 6.48%  |
|     | GTP-binding nuclear protein Ran (Fragment)        | J3KQE5_HUMAN      | 27 kDa  | 0.06 | 0.04 | 0.08 | 0.06 | 0.04 | 0.05 | 15  | 6   | 13  | 19  | 10  | 14  | 2  | 2  | 2 | 3  | 2  | 2  | 10.70% | 10.70% | 10.70% | 15.00% | 10.70% | 10.70% |
| 107 | Elongation factor 1-gamma                         | EF1G_HUMAN        | 50 kDa  | 0.04 | 0.02 | 0.02 | 0.04 | 0.02 | 0.05 | 20  | 5   | 6   | 23  | 12  | 25  | 5  | 2  | 3 | 5  | 4  | 5  | 10.50% | 5.03%  | 8.24%  | 10.50% | 10.50% | 10.50% |
| 108 | Tenascin                                          | J3QSU6_HUMAN (+1) | 221 kDa | 0.00 | 0.00 | 0.00 | 0.00 | 0.00 | 0.01 | 0   | 5   | 0   | 0   | 0   | 24  | 0  | 2  | 0 | 0  | 0  | 5  | 0      | 2.13%  | 0      | 0      | 0      | 3.02%  |

|     |                                                                                            |                   |         |      |      |      |      |      |      |    |    |    |    |    |    |    |   |   |    |   |   |        |        |        |        |        |        |       |
|-----|--------------------------------------------------------------------------------------------|-------------------|---------|------|------|------|------|------|------|----|----|----|----|----|----|----|---|---|----|---|---|--------|--------|--------|--------|--------|--------|-------|
| 109 | Cation-independent mannose-6-phosphate receptor X-ray repair cross-complementing protein 6 | MPRI_HUMAN        | 274 kDa | 0.00 | 0.01 | 0.01 | 0.00 | 0.00 | 0.01 | 8  | 9  | 9  | 16 | 12 | 16 | 2  | 2 | 2 | 2  | 3 | 2 | 0.72%  | 0.72%  | 0.72%  | 0.72%  | 0.76%  | 0.72%  |       |
| 110 | Valine-tRNA ligase                                                                         | B1AHC9_HUMAN      | 64 kDa  | 0.01 | 0.00 | 0.00 | 0.07 | 0.03 | 0.08 | 8  | 0  | 0  | 54 | 19 | 51 | 3  | 0 | 0 | 9  | 6 | 7 | 8.41%  | 0      | 0      | 17.20% | 13.10% | 15.40% |       |
| 111 | Nucleosome assembly protein 1-like 1                                                       | SVYC_HUMAN        | 140 kDa | 0.01 | 0.00 | 0.00 | 0.02 | 0.00 | 0.01 | 8  | 0  | 0  | 35 | 3  | 12 | 3  | 0 | 0 | 10 | 3 | 4 | 4.03%  | 0      | 0      | 10.70% | 3.56%  | 6.17%  |       |
| 112 | Lysosomal alpha-mannosidase                                                                | NP1L1_HUMAN       | 45 kDa  | 0.06 | 0.02 | 0.07 | 0.07 | 0.05 | 0.04 | 26 | 5  | 18 | 39 | 20 | 18 | 3  | 2 | 2 | 9  | 2 | 4 | 14.60% | 7.16%  | 7.16%  | 29.90% | 7.16%  | 13.00% |       |
| 113 | Proteasome subunit beta type-1                                                             | MA2B1_HUMAN       | 114 kDa | 0.02 | 0.00 | 0.01 | 0.02 | 0.00 | 0.03 | 24 | 0  | 6  | 29 | 5  | 30 | 7  | 0 | 5 | 8  | 4 | 8 | 11.80% | 0      | 6.82%  | 11.80% | 5.64%  | 11.00% |       |
| 114 | Annexin A1                                                                                 | PSB1_HUMAN        | 26 kDa  | 0.16 | 0.04 | 0.08 | 0.14 | 0.11 | 0.09 | 41 | 6  | 13 | 45 | 31 | 23 | 8  | 2 | 3 | 6  | 4 | 4 | 34.90% | 14.10% | 14.10% | 23.70% | 14.10% | 14.10% |       |
| 115 | Lipoprotein lipase                                                                         | ANXA1_HUMAN       | 39 kDa  | 0.07 | 0.15 | 0.02 | 0.06 | 0.12 | 0.03 | 28 | 32 | 4  | 28 | 47 | 10 | 5  | 6 | 3 | 5  | 9 | 4 | 17.30% | 24.30% | 13.00% | 19.70% | 29.80% | 17.30% |       |
| 116 | Thrombospondin-4                                                                           | LIPL_HUMAN        | 53 kDa  | 0.05 | 0.04 | 0.12 | 0.00 | 0.00 | 0.03 | 25 | 12 | 38 | 0  | 0  | 15 | 7  | 3 | 8 | 0  | 0 | 3 | 19.20% | 10.30% | 19.20% | 0      | 0      | 10.30% |       |
| 117 | T-complex protein 1 subunit gamma                                                          | E7ES19_HUMAN (+1) | 96 kDa  | 0.00 | 0.00 | 0.01 | 0.01 | 0.01 | 0.01 | 0  | 0  | 5  | 13 | 19 | 17 | 0  | 0 | 2 | 2  | 5 | 3 | 0      | 0      | 3.56%  | 3.68%  | 6.67%  | 5.17%  |       |
| 118 | F-actin-capping protein subunit alpha-1                                                    | TCPG_HUMAN        | 61 kDa  | 0.03 | 0.00 | 0.00 | 0.03 | 0.00 | 0.02 | 17 | 0  | 0  | 24 | 0  | 14 | 4  | 0 | 0 | 5  | 0 | 3 | 10.80% | 0      | 0      | 15.00% | 0      | 8.81%  |       |
| 119 | Betaine-homocysteine S-methyltransferase 1                                                 | CAZA1_HUMAN       | 33 kDa  | 0.09 | 0.05 | 0.08 | 0.08 | 0.09 | 0.07 | 29 | 9  | 15 | 31 | 28 | 24 | 3  | 2 | 3 | 4  | 5 | 5 | 17.10% | 11.50% | 17.10% | 20.60% | 29.70% | 29.70% |       |
| 120 | L-lactate dehydrogenase B chain                                                            | BHMT1_HUMAN       | 45 kDa  | 0.04 | 0.08 | 0.11 | 0.03 | 0.04 | 0.04 | 16 | 21 | 29 | 14 | 19 | 20 | 2  | 4 | 3 | 2  | 2 | 2 | 6.40%  | 13.80% | 8.62%  | 6.16%  | 6.40%  | 6.40%  |       |
| 121 | Palmitoyl-protein thioesterase 1                                                           | LDHB_HUMAN        | 37 kDa  | 0.05 | 0.10 | 0.06 | 0.05 | 0.07 | 0.05 | 17 | 22 | 13 | 23 | 26 | 17 | 4  | 5 | 4 | 5  | 7 | 4 | 14.70% | 16.80% | 12.60% | 19.50% | 22.50% | 16.20% |       |
| 122 | Apolipoprotein A-IV                                                                        | PPT1_HUMAN        | 34 kDa  | 0.14 | 0.08 | 0.10 | 0.06 | 0.05 | 0.04 | 45 | 16 | 20 | 25 | 19 | 15 | 5  | 4 | 5 | 4  | 4 | 3 | 21.90% | 21.90% | 21.90% | 21.90% | 21.90% | 21.90% |       |
| 123 | Uncharacterized protein                                                                    | APOA4_HUMAN       | 45 kDa  | 0.05 | 0.07 | 0.08 | 0.06 | 0.03 | 0.03 | 22 | 18 | 20 | 31 | 15 | 15 | 2  | 2 | 2 | 3  | 2 | 2 | 5.81%  | 5.81%  | 5.81%  | 5.81%  | 5.81%  | 5.81%  |       |
| 124 | Hsp90 co-chaperone Cdc37                                                                   | B4E124_HUMAN      | 141 kDa | 0.00 | 0.00 | 0.00 | 0.00 | 0.00 | 0.00 | 0  | 0  | 0  | 7  | 0  | 0  | 0  | 0 | 0 | 2  | 0 | 0 | 0      | 0      | 0      | 1.66%  | 0      | 0      |       |
| 125 | Actin-related protein 2/3                                                                  | CDC37_HUMAN       | 44 kDa  | 0.00 | 0.00 | 0.02 | 0.02 | 0.00 | 0.03 | 0  | 0  | 6  | 9  | 0  | 11 | 0  | 0 | 3 | 3  | 0 | 3 | 0      | 0      | 0      | 7.94%  | 7.94%  | 0      | 7.94% |
| 126 | T-complex protein 1 subunit alpha                                                          | ARPC4_HUMAN (+1)  | 20 kDa  | 0.20 | 0.00 | 0.00 | 0.20 | 0.00 | 0.00 | 37 | 0  | 0  | 45 | 0  | 0  | 5  | 0 | 0 | 5  | 0 | 0 | 41.70% | 0      | 0      | 41.70% | 0      | 0      |       |
| 127 | T-complex protein 1 subunit theta                                                          | TCPA_HUMAN        | 60 kDa  | 0.03 | 0.00 | 0.00 | 0.05 | 0.02 | 0.03 | 18 | 0  | 0  | 35 | 12 | 17 | 5  | 0 | 0 | 7  | 3 | 2 | 19.40% | 0      | 0      | 15.30% | 5.76%  | 5.76%  |       |
| 128 | 14-3-3 protein gamma                                                                       | TCPQ_HUMAN        | 60 kDa  | 0.06 | 0.00 | 0.00 | 0.04 | 0.03 | 0.03 | 36 | 0  | 0  | 27 | 16 | 20 | 9  | 0 | 0 | 5  | 3 | 5 | 19.70% | 0      | 0      | 11.30% | 7.12%  | 11.10% |       |
| 129 | Heterogeneous nuclear ribonucleoprotein U                                                  | 1433G_HUMAN       | 28 kDa  | 0.07 | 0.10 | 0.13 | 0.07 | 0.13 | 0.10 | 24 | 23 | 32 | 36 | 3  | 13 | 4  | 3 | 4 | 4  | 4 | 3 | 17.40% | 17.40% | 17.40% | 21.10% | 21.10% | 17.40% |       |
| 130 | Nucleobindin-1                                                                             | HNRPU_HUMAN       | 91 kDa  | 0.00 | 0.00 | 0.00 | 0.00 | 0.00 | 0.03 | 0  | 0  | 0  | 0  | 0  | 29 | 0  | 0 | 0 | 0  | 0 | 2 | 0      | 0      | 0      | 0      | 0      | 4.12%  |       |
| 131 | BTB/POZ domain-containing protein KCTD12                                                   | NUCB1_HUMAN       | 54 kDa  | 0.00 | 0.07 | 0.04 | 0.00 | 0.04 | 0.03 | 0  | 21 | 13 | 0  | 19 | 13 | 0  | 4 | 3 | 0  | 4 | 3 | 0      | 13.70% | 11.70% | 0      | 13.70% | 11.70% |       |
| 132 | Basement membrane-specific heparan sulfate proteoglycan core protein                       | KCD12_HUMAN       | 36 kDa  | 0.03 | 0.00 | 0.03 | 0.05 | 0.04 | 0.04 | 11 | 0  | 7  | 22 | 16 | 13 | 4  | 0 | 2 | 5  | 4 | 3 | 18.80% | 0      | 7.38%  | 21.80% | 18.50% | 12.00% |       |
| 133 | Bifunctional glutamate/proline-tRNA ligase                                                 | PGBM_HUMAN        | 469 kDa | 0.00 | 0.00 | 0.01 | 0.00 | 0.00 | 0.01 | 5  | 0  | 15 | 0  | 20 | 33 | 2  | 0 | 4 | 0  | 5 | 6 | 0.73%  | 0      | 1.43%  | 0      | 1.43%  | 1.96%  |       |
| 134 | Cytosol aminopeptidase                                                                     | SYEP_HUMAN        | 171 kDa | 0.00 | 0.00 | 0.00 | 0.00 | 0.00 | 0.01 | 5  | 0  | 0  | 10 | 6  | 25 | 4  | 0 | 0 | 4  | 3 | 6 | 4.56%  | 0      | 0      | 4.76%  | 2.58%  | 6.94%  |       |
| 135 | Actin-related protein 2/3 complex subunit 1B                                               | AMPL_HUMAN        | 56 kDa  | 0.00 | 0.00 | 0.00 | 0.04 | 0.03 | 0.06 | 0  | 0  | 0  | 25 | 18 | 34 | 0  | 0 | 0 | 6  | 3 | 7 | 0      | 0      | 0      | 14.80% | 9.06%  | 17.90% |       |
| 136 | 60 kDa heat shock protein, mitochondrial                                                   | ARC1B_HUMAN       | 41 kDa  | 0.05 | 0.00 | 0.00 | 0.00 | 0.00 | 0.03 | 20 | 0  | 0  | 0  | 0  | 13 | 3  | 0 | 0 | 0  | 0 | 3 | 8.33%  | 0      | 0      | 0      | 0      | 9.95%  |       |
| 137 | Lamin-B1                                                                                   | CH60_HUMAN        | 61 kDa  | 0.00 | 0.00 | 0.00 | 0.02 | 0.01 | 0.01 | 0  | 0  | 0  | 13 | 9  | 5  | 0  | 0 | 0 | 5  | 2 | 3 | 0      | 0      | 0      | 14.30% | 8.55%  | 10.60% |       |
| 138 | Cytoplasmic dynein 1 heavy chain 1                                                         | LMNB1_HUMAN       | 66 kDa  | 0.01 | 0.00 | 0.00 | 0.03 | 0.02 | 0.02 | 6  | 0  | 0  | 28 | 10 | 10 | 2  | 0 | 0 | 8  | 3 | 2 | 9.22%  | 0      | 0      | 19.50% | 8.70%  | 6.48%  |       |
| 139 | 26S proteasome non-ATPase regulatory subunit 2                                             | DYHC1_HUMAN       | 532 kDa | 0.00 | 0.00 | 0.00 | 0.00 | 0.00 | 0.00 | 19 | 0  | 0  | 16 | 0  | 14 | 10 | 0 | 0 | 6  | 0 | 7 | 3.53%  | 0      | 0      | 2.56%  | 0      | 2.28%  |       |
| 140 | Tetranectin                                                                                | PSMD2_HUMAN       | 100 kDa | 0.01 | 0.00 | 0.00 | 0.03 | 0.01 | 0.04 | 13 | 0  | 0  | 41 | 14 | 42 | 5  | 0 | 0 | 6  | 4 | 7 | 7.93%  | 0      | 0      | 8.15%  | 6.61%  | 8.15%  |       |
| 141 | Keratin, type I cytoskeletal 14                                                            | E9PHK0_HUMAN (+1) | 18 kDa  | 0.00 | 0.25 | 0.24 | 0.00 | 0.13 | 0.00 | 0  | 25 | 25 | 0  | 24 | 0  | 0  | 3 | 3 | 0  | 2 | 0 | 0      | 21.90% | 21.90% | 0      | 21.90% | 0      |       |
| 142 | T-complex protein 1 subunit delta                                                          | K1C14_HUMAN       | 52 kDa  | 0.08 | 0.05 | 0.00 | 0.04 | 0.02 | 0.05 | 90 | 49 | 0  | 42 | 29 | 38 | 10 | 2 | 0 | 2  | 2 | 3 | 37.90% | 12.30% | 0      | 7.84%  | 7.84%  | 9.96%  |       |
| 143 | L-amino-acid oxidase                                                                       | TCPD_HUMAN        | 58 kDa  | 0.03 | 0.00 | 0.00 | 0.03 | 0.02 | 0.03 | 17 | 0  | 0  | 22 | 11 | 18 | 2  | 0 | 0 | 6  | 2 | 3 | 5.38%  | 0      | 0      | 15.00% | 4.45%  | 6.86%  |       |
| 144 | Heat shock 70 kDa protein 4                                                                | OXLA_HUMAN        | 63 kDa  | 0.00 | 0.00 | 0.00 | 0.02 | 0.02 | 0.01 | 0  | 0  | 0  | 17 | 12 | 8  | 0  | 0 | 0 | 6  | 6 | 2 | 0      | 0      | 0      | 12.70% | 12.70% | 6.70%  |       |
| 145 | Proteoglycan 4                                                                             | HSP74_HUMAN       | 94 kDa  | 0.00 | 0.00 | 0.00 | 0.01 | 0.01 | 0.01 | 0  | 0  | 0  | 12 | 13 | 13 | 0  | 0 | 0 | 2  | 5 | 3 | 0      | 0      | 0      | 4.17%  | 8.69%  | 5.48%  |       |
| 146 | Cathepsin S                                                                                | PRG4_HUMAN        | 151 kDa | 0.01 | 0.00 | 0.00 | 0.01 | 0.00 | 0.00 | 17 | 0  | 0  | 22 | 0  | 0  | 3  | 0 | 0 | 3  | 0 | 0 | 3.13%  | 0      | 0      | 3.13%  | 0      | 0      |       |
| 147 | Cartilage oligomeric matrix protein                                                        | CATS_HUMAN        | 37 kDa  | 0.03 | 0.03 | 0.04 | 0.03 | 0.06 | 0.04 | 11 | 6  | 8  | 14 | 22 | 15 | 2  | 2 | 2 | 3  | 3 | 2 | 5.74%  | 6.34%  | 6.34%  | 8.76%  | 8.76%  | 6.34%  |       |
| 148 | Protein disulfide-isomerase A3                                                             | COMP_HUMAN (+1)   | 83 kDa  | 0.00 | 0.03 | 0.03 | 0.00 | 0.03 | 0.02 | 0  | 22 | 18 | 0  | 31 | 23 | 0  | 3 | 3 | 0  | 3 | 2 | 0      | 6.21%  | 6.21%  | 0      | 7.93%  | 4.49%  |       |
| 149 | Prosaposin                                                                                 | PDIA3_HUMAN       | 57 kDa  | 0.00 | 0.00 | 0.00 | 0.05 | 0.04 | 0.03 | 0  | 0  | 0  | 34 | 24 | 17 | 0  | 0 | 0 | 8  | 5 | 4 | 0      | 0      | 0      | 18.00% | 13.10% | 10.30% |       |
| 150 | Serine/threonine-protein phosphatase 2A 65 kDa regulatory subunit A alpha isoform          | SAP_HUMAN         | 58 kDa  | 0.05 | 0.00 | 0.00 | 0.01 | 0.00 | 0.02 | 30 | 0  | 0  | 7  | 0  | 10 | 6  | 0 | 0 | 3  | 0 | 3 | 13.70% | 0      | 0      | 10.70% | 0      | 10.70% |       |
| 151 |                                                                                            | ENPL_HUMAN        | 92 kDa  | 0.00 | 0.00 | 0.00 | 0.01 | 0.03 | 0.02 | 0  | 0  | 0  | 30 | 45 | 37 | 0  | 0 | 0 | 3  | 7 | 3 | 0      | 0      | 0      | 5.98%  | 14.30% | 7.85%  |       |
| 152 |                                                                                            | 2AAA_HUMAN        | 65 kDa  | 0.00 | 0.00 | 0.00 | 0.01 | 0.01 | 0.01 | 3  | 0  | 0  | 7  | 7  | 9  | 2  | 0 | 0 | 3  | 3 | 4 | 4.75%  | 0      | 0      | 6.45%  | 8.15%  | 9.85%  |       |

|     |                                                                                      |                   |         |      |      |      |      |      |      |    |    |    |    |    |    |    |   |   |    |   |   |        |        |        |        |        |        |        |
|-----|--------------------------------------------------------------------------------------|-------------------|---------|------|------|------|------|------|------|----|----|----|----|----|----|----|---|---|----|---|---|--------|--------|--------|--------|--------|--------|--------|
| 153 | Carboxypeptidase N catalytic chain                                                   | CBPN_HUMAN        | 52 kDa  | 0.00 | 0.05 | 0.05 | 0.00 | 0.02 | 0.02 | 0  | 15 | 14 | 0  | 12 | 12 | 0  | 3 | 2 | 0  | 3 | 2 | 0      | 6.33%  | 6.33%  | 0      | 6.33%  | 6.33%  |        |
| 154 | Bifunctional purine biosynthesis protein PURH                                        | PUR9_HUMAN        | 65 kDa  | 0.00 | 0.00 | 0.00 | 0.04 | 0.01 | 0.03 | 0  | 0  | 0  | 32 | 8  | 22 | 0  | 0 | 0 | 10 | 3 | 5 | 0      | 0      | 0      | 24.50% | 9.29%  | 15.00% |        |
| 155 | Receptor-type tyrosine-protein phosphatase F C-type lectin domain family 11 member A | PTPRF_HUMAN       | 213 kDa | 0.00 | 0.00 | 0.00 | 0.00 | 0.00 | 0.00 | 3  | 0  | 0  | 10 | 0  | 5  | 2  | 0 | 0 | 3  | 0 | 3 | 1.57%  | 0      | 0      | 2.15%  | 0      | 2.15%  |        |
| 156 | T-complex protein 1 subunit eta                                                      | TCPH_HUMAN        | 59 kDa  | 0.07 | 0.00 | 0.00 | 0.03 | 0.00 | 0.04 | 39 | 0  | 0  | 24 | 0  | 25 | 5  | 0 | 0 | 3  | 0 | 4 | 11.40% | 0      | 0      | 8.47%  | 0      | 9.94%  |        |
| 158 | Proteasome subunit beta type-3 (Fragment)                                            | A0A087WUL2_HUMAN  | 16 kDa  | 0.21 | 0.00 | 0.00 | 0.14 | 0.00 | 0.00 | 33 | 0  | 0  | 27 | 0  | 0  | 4  | 0 | 0 | 3  | 0 | 0 | 33.10% | 0      | 0      | 33.10% | 0      | 0      |        |
| 159 | Fructose-bisphosphate aldolase B                                                     | ALDOB_HUMAN       | 39 kDa  | 0.00 | 0.12 | 0.09 | 0.00 | 0.06 | 0.05 | 0  | 28 | 22 | 0  | 24 | 20 | 0  | 5 | 4 | 0  | 4 | 3 | 0      | 11.50% | 8.79%  | 0      | 8.79%  | 8.79%  |        |
| 160 | Ras-related protein Rap-1A                                                           | RAP1A_HUMAN       | 21 kDa  | 0.07 | 0.11 | 0.00 | 0.07 | 0.00 | 0.00 | 14 | 13 | 0  | 17 | 0  | 0  | 2  | 2 | 0 | 2  | 0 | 0 | 12.50% | 12.50% | 0      | 12.50% | 0      | 0      |        |
| 161 | 14-3-3 protein epsilon                                                               | 1433E_HUMAN       | 29 kDa  | 0.00 | 0.00 | 0.00 | 0.00 | 0.08 | 0.00 | 0  | 0  | 0  | 0  | 36 | 0  | 0  | 0 | 0 | 0  | 3 | 0 | 0      | 0      | 0      | 0      | 16.10% | 0      |        |
| 162 | Heat shock protein beta-1 Glycogen phosphorylase, liver form                         | HSPB1_HUMAN       | 23 kDa  | 0.06 | 0.00 | 0.16 | 0.07 | 0.08 | 0.08 | 13 | 0  | 22 | 20 | 18 | 19 | 2  | 0 | 2 | 4  | 3 | 2 | 13.20% | 0      | 13.20% | 36.10% | 21.00% | 13.20% |        |
| 163 | 60S acidic ribosomal protein P0                                                      | RYL2_HUMAN        | 34 kDa  | 0.00 | 0.00 | 0.00 | 0.06 | 0.07 | 0.06 | 0  | 0  | 0  | 26 | 26 | 21 | 0  | 0 | 0 | 5  | 7 | 5 | 0      | 0      | 0      | 23.30% | 32.20% | 23.70% |        |
| 165 | cytoplasmic Neogenin                                                                 | SYWC_HUMAN        | 53 kDa  | 0.00 | 0.00 | 0.00 | 0.03 | 0.04 | 0.02 | 0  | 0  | 0  | 20 | 23 | 10 | 0  | 0 | 0 | 4  | 3 | 3 | 0      | 0      | 0      | 10.80% | 10.80% | 10.80% |        |
| 166 | Neogenin                                                                             | NEO1_HUMAN        | 160 kDa | 0.00 | 0.01 | 0.01 | 0.01 | 0.00 | 0.02 | 0  | 12 | 10 | 18 | 6  | 25 | 0  | 6 | 4 | 5  | 3 | 5 | 0      | 7.05%  | 5.13%  | 0      | 4.72%  | 3.97%  | 5.20%  |
| 167 | Keratin, type I cytoskeletal 16                                                      | K1C16_HUMAN       | 51 kDa  | 0.10 | 0.01 | 0.00 | 0.00 | 0.00 | 0.00 | 75 | 34 | 0  | 0  | 0  | 0  | 13 | 2 | 0 | 0  | 0 | 0 | 35.70% | 6.34%  | 0      | 0      | 0      | 0      |        |
| 168 | Spectrin alpha chain, non-erythrocytic 1                                             | SPTN1_HUMAN       | 285 kDa | 0.00 | 0.00 | 0.00 | 0.00 | 0.00 | 0.00 | 0  | 0  | 0  | 4  | 0  | 0  | 0  | 0 | 0 | 0  | 3 | 0 | 0      | 0      | 0      | 0      | 2.06%  | 0      | 0      |
| 169 | Collagen alpha-1(I) chain                                                            | CO2A1_HUMAN       | 142 kDa | 0.00 | 0.00 | 0.00 | 0.00 | 0.00 | 0.00 | 0  | 0  | 2  | 0  | 0  | 0  | 0  | 0 | 2 | 0  | 0 | 0 | 0      | 0      | 0      | 1.61%  | 0      | 0      | 0      |
| 170 | Collagen alpha-1(XII) chain                                                          | COCA1_HUMAN (+1)  | 333 kDa | 0.00 | 0.00 | 0.00 | 0.00 | 0.00 | 0.01 | 0  | 0  | 0  | 0  | 11 | 18 | 0  | 0 | 0 | 0  | 3 | 5 | 0      | 0      | 0      | 0      | 0      | 1.53%  | 2.51%  |
| 171 | Importin subunit beta-1                                                              | IMB1_HUMAN        | 97 kDa  | 0.01 | 0.00 | 0.01 | 0.01 | 0.01 | 0.02 | 13 | 0  | 6  | 14 | 14 | 18 | 3  | 0 | 2 | 3  | 2 | 2 | 6.74%  | 0      | 3.08%  | 3.08%  | 3.08%  | 3.08%  |        |
| 172 | Cullin-associated NEDD8-dissociated protein 1                                        | CAND1_HUMAN       | 136 kDa | 0.00 | 0.00 | 0.00 | 0.00 | 0.00 | 0.00 | 0  | 0  | 0  | 3  | 0  | 5  | 0  | 0 | 0 | 0  | 3 | 0 | 2      | 0      | 0      | 0      | 3.33%  | 0      | 3.33%  |
| 173 | Protein disulfide-isomerase A6                                                       | PDIA6_HUMAN       | 48 kDa  | 0.01 | 0.00 | 0.00 | 0.06 | 0.05 | 0.03 | 4  | 0  | 0  | 34 | 24 | 17 | 3  | 0 | 0 | 5  | 3 | 3 | 14.30% | 0      | 0      | 18.20% | 14.30% | 14.30% |        |
| 174 | 4-trimethylaminobutylaldehyde dehydrogenase                                          | AL9A1_HUMAN       | 54 kDa  | 0.00 | 0.02 | 0.04 | 0.00 | 0.03 | 0.02 | 0  | 7  | 14 | 0  | 16 | 11 | 0  | 2 | 2 | 0  | 3 | 3 | 0      | 4.45%  | 4.45%  | 0      | 6.88%  | 6.88%  |        |
| 175 | Deoxynucleoside triphosphate triphosphohydrolase SAMHD1                              | SAMH1_HUMAN       | 72 kDa  | 0.00 | 0.00 | 0.00 | 0.01 | 0.00 | 0.00 | 0  | 0  | 0  | 10 | 0  | 0  | 0  | 0 | 0 | 2  | 0 | 0 | 0      | 0      | 0      | 3.99%  | 0      | 0      |        |
| 176 | Chloride intracellular channel protein 1                                             | CLIC1_HUMAN       | 27 kDa  | 0.04 | 0.00 | 0.08 | 0.04 | 0.00 | 0.05 | 11 | 0  | 12 | 14 | 0  | 14 | 2  | 0 | 2 | 4  | 0 | 2 | 12.40% | 0      | 12.40% | 28.60% | 0      | 12.40% |        |
| 177 | Proteasome subunit beta type-4                                                       | PSB4_HUMAN        | 29 kDa  | 0.08 | 0.00 | 0.00 | 0.04 | 0.00 | 0.03 | 22 | 0  | 0  | 16 | 0  | 9  | 5  | 0 | 0 | 5  | 0 | 2 | 26.10% | 0      | 0      | 26.10% | 0      | 12.90% |        |
| 178 | Dermcidin                                                                            | DCD_HUMAN         | 11 kDa  | 0.17 | 0.14 | 0.00 | 0.00 | 0.00 | 0.15 | 20 | 10 | 0  | 0  | 0  | 19 | 3  | 2 | 0 | 0  | 0 | 3 | 22.70% | 20.00% | 0      | 0      | 0      | 32.70% |        |
| 179 | Tenascin-X                                                                           | E7EPZ9_HUMAN (+1) | 458 kDa | 0.00 | 0.00 | 0.00 | 0.00 | 0.00 | 0.00 | 0  | 0  | 0  | 0  | 0  | 3  | 0  | 0 | 0 | 0  | 0 | 2 | 0      | 0      | 0      | 0      | 0      | 0.52%  |        |
| 180 | Proteasome subunit alpha type-6                                                      | PSA6_HUMAN        | 27 kDa  | 0.07 | 0.00 | 0.02 | 0.07 | 0.00 | 0.05 | 19 | 0  | 3  | 22 | 0  | 13 | 4  | 0 | 2 | 4  | 0 | 2 | 17.50% | 0      | 12.60% | 21.50% | 0      | 12.60% |        |
| 181 | Proteasome subunit alpha type-3                                                      | PSA3_HUMAN        | 28 kDa  | 0.05 | 0.00 | 0.00 | 0.05 | 0.00 | 0.00 | 15 | 0  | 0  | 18 | 0  | 0  | 4  | 0 | 0 | 5  | 0 | 0 | 16.90% | 0      | 0      | 16.90% | 0      | 0      |        |
| 182 | Collagen alpha-3(VI) chain                                                           | CO6A3_HUMAN       | 344 kDa | 0.00 | 0.00 | 0.00 | 0.00 | 0.00 | 0.00 | 0  | 0  | 0  | 7  | 0  | 0  | 0  | 0 | 0 | 2  | 2 | 0 | 0      | 0      | 0      | 0.79%  | 0.79%  | 0      | 0      |
| 183 | Sulfhydryl oxidase 1                                                                 | QSOX1_HUMAN       | 83 kDa  | 0.00 | 0.02 | 0.00 | 0.02 | 0.00 | 0.00 | 0  | 10 | 0  | 17 | 0  | 0  | 2  | 0 | 0 | 2  | 0 | 0 | 0      | 0      | 4.28%  | 0      | 3.35%  | 0      | 0      |
| 184 | Tubulin beta-6 chain                                                                 | TBB6_HUMAN        | 50 kDa  | 0.03 | 0.00 | 0.00 | 0.05 | 0.01 | 0.02 | 47 | 0  | 0  | 84 | 53 | 45 | 6  | 0 | 8 | 3  | 3 | 3 | 41.90% | 0      | 0      | 47.80% | 31.20% | 31.40% |        |
| 185 | 40S ribosomal protein SA X-ray repair cross-complementing protein 5                  | A0A0C4DG17_HUMAN  | 33 kDa  | 0.06 | 0.00 | 0.00 | 0.04 | 0.06 | 0.05 | 21 | 0  | 0  | 17 | 21 | 17 | 3  | 0 | 0 | 3  | 4 | 3 | 12.70% | 0      | 0      | 17.70% | 20.30% | 12.70% |        |
| 186 | complementing protein 5                                                              | XRCC5_HUMAN       | 83 kDa  | 0.02 | 0.00 | 0.00 | 0.02 | 0.00 | 0.01 | 13 | 0  | 0  | 20 | 0  | 9  | 5  | 0 | 0 | 6  | 0 | 4 | 12.80% | 0      | 0      | 7.65%  | 0      | 5.46%  |        |
| 187 | Histone H4                                                                           | H4_HUMAN          | 11 kDa  | 0.13 | 0.00 | 0.00 | 0.08 | 0.00 | 0.15 | 15 | 0  | 0  | 11 | 0  | 17 | 4  | 0 | 0 | 4  | 0 | 5 | 42.70% | 0      | 0      | 42.70% | 0      | 42.70% |        |
| 188 | Serpin H1                                                                            | SERP1_HUMAN       | 46 kDa  | 0.00 | 0.00 | 0.00 | 0.00 | 0.01 | 0.00 | 0  | 0  | 0  | 0  | 6  | 0  | 0  | 0 | 0 | 0  | 2 | 0 | 0      | 0      | 0      | 0      | 0      | 5.74%  | 0      |
| 189 | Laminin subunit beta-1                                                               | G3XAI2_HUMAN (+1) | 200 kDa | 0.00 | 0.00 | 0.00 | 0.00 | 0.00 | 0.00 | 0  | 0  | 0  | 0  | 0  | 10 | 0  | 0 | 0 | 0  | 0 | 2 | 0      | 0      | 0      | 0      | 0      | 0      | 1.44%  |
| 190 | V-type proton ATPase catalytic subunit A                                             | VATA_HUMAN        | 68 kDa  | 0.03 | 0.00 | 0.00 | 0.02 | 0.00 | 0.02 | 18 | 0  | 0  | 13 | 0  | 11 | 3  | 0 | 0 | 3  | 0 | 3 | 5.67%  | 0      | 0      | 5.35%  | 0      | 5.67%  |        |
| 191 | Staphylococcal nuclease domain-containing protein 1                                  | SND1_HUMAN        | 102 kDa | 0.00 | 0.00 | 0.00 | 0.01 | 0.01 | 0.02 | 4  | 0  | 0  | 11 | 10 | 19 | 2  | 0 | 0 | 3  | 4 | 5 | 4.84%  | 0      | 0      | 6.59%  | 8.02%  | 9.34%  |        |
| 192 | Synaptic vesicle membrane protein VAT-1 homolog                                      | VAT1_HUMAN        | 42 kDa  | 0.00 | 0.00 | 0.00 | 0.03 | 0.00 | 0.00 | 0  | 0  | 0  | 17 | 0  | 0  | 0  | 0 | 0 | 0  | 3 | 0 | 0      | 0      | 0      | 0      | 10.40% | 0      | 0      |
| 193 | S-adenosylmethionine synthase isoform type-2                                         | METK2_HUMAN       | 44 kDa  | 0.00 | 0.00 | 0.00 | 0.02 | 0.03 | 0.04 | 0  | 0  | 0  | 11 | 13 | 17 | 0  | 0 | 0 | 3  | 2 | 3 | 0      | 0      | 0      | 9.87%  | 7.59%  | 7.59%  |        |
| 194 | Coronin-1B                                                                           | COR1B_HUMAN       | 54 kDa  | 0.00 | 0.00 | 0.00 | 0.02 | 0.00 | 0.02 | 0  | 0  | 0  | 12 | 0  | 13 | 0  | 0 | 0 | 3  | 0 | 2 | 0      | 0      | 0      | 0      | 14.10% | 0      | 9.00%  |
| 195 | Heterogeneous nuclear ribonucleoprotein D0                                           | HNRPD_HUMAN       | 38 kDa  | 0.00 | 0.00 | 0.00 | 0.00 | 0.00 | 0.03 | 0  | 0  | 0  | 0  | 0  | 11 | 0  | 0 | 0 | 0  | 0 | 3 | 0      | 0      | 0      | 0      | 0      | 0      | 11.30% |
| 196 | Glucose-6-phosphate isomerase (Fragment)                                             | A0A0A0MTS2_HUMAN  | 65 kDa  | 0.00 | 0.00 | 0.00 | 0.00 | 0.03 | 0.00 | 0  | 0  | 0  | 0  | 0  | 22 | 0  | 0 | 0 | 0  | 5 | 0 | 0      | 0      | 0      | 0      | 0      | 8.20%  | 0      |

|     |                                                                         |                   |         |      |      |      |      |      |      |     |    |    |     |     |     |   |   |   |   |   |   |        |        |        |        |        |        |       |
|-----|-------------------------------------------------------------------------|-------------------|---------|------|------|------|------|------|------|-----|----|----|-----|-----|-----|---|---|---|---|---|---|--------|--------|--------|--------|--------|--------|-------|
| 197 | L-lactate dehydrogenase A chain Multifunctional protein ADE2 (Fragment) | LDHA_HUMAN        | 37 kDa  | 0.00 | 0.01 | 0.02 | 0.02 | 0.07 | 0.04 | 0   | 2  | 4  | 9   | 25  | 14  | 0 | 2 | 2 | 3 | 5 | 4 | 0      | 8.73%  | 9.04%  | 9.34%  | 16.60% | 16.60% |       |
| 198 | Collagen alpha-1(III) chain                                             | E9PB51_HUMAN (+1) | 46 kDa  | 0.01 | 0.00 | 0.00 | 0.03 | 0.00 | 0.00 | 4   | 0  | 0  | 19  | 0   | 0   | 4 | 0 | 0 | 2 | 0 | 0 | 13.30% | 0      | 0      | 6.05%  | 0      | 0      |       |
| 199 | ATP-dependent RNA helicase A 26S protease regulatory subunit 7          | CO3A1_HUMAN       | 139 kDa | 0.00 | 0.02 | 0.02 | 0.00 | 0.01 | 0.00 | 0   | 19 | 17 | 0   | 19  | 5   | 0 | 2 | 2 | 0 | 2 | 2 | 0      | 1.84%  | 1.84%  | 0      | 1.84%  | 1.84%  |       |
| 200 | Annexin A2                                                              | DHX9_HUMAN        | 141 kDa | 0.00 | 0.00 | 0.00 | 0.01 | 0.00 | 0.01 | 0   | 0  | 0  | 9   | 4   | 8   | 0 | 0 | 0 | 3 | 2 | 3 | 0      | 0      | 0      | 5.91%  | 2.83%  | 4.49%  |       |
| 201 | Receptor-type tyrosine-protein phosphatase 5                            | PR57_HUMAN        | 49 kDa  | 0.03 | 0.00 | 0.00 | 0.03 | 0.01 | 0.03 | 13  | 0  | 0  | 16  | 6   | 16  | 3 | 0 | 0 | 5 | 2 | 4 | 10.20% | 0      | 0      | 15.70% | 7.85%  | 11.80% |       |
| 202 | Cotomer subunit beta'                                                   | ANXA2_HUMAN       | 39 kDa  | 0.05 | 0.00 | 0.00 | 0.05 | 0.02 | 0.02 | 18  | 0  | 0  | 23  | 8   | 6   | 4 | 0 | 0 | 6 | 2 | 2 | 15.30% | 0      | 0      | 21.80% | 7.67%  | 7.67%  |       |
| 203 | Protocadherin Fat 1                                                     | PTPRS_HUMAN       | 217 kDa | 0.00 | 0.00 | 0.01 | 0.00 | 0.01 | 0.01 | 0   | 0  | 10 | 0   | 17  | 21  | 0 | 0 | 2 | 0 | 3 | 4 | 0      | 0      | 0      | 1.54%  | 0      | 2.72%  | 3.85% |
| 204 | Beta-actin-like protein 2                                               | COPB2_HUMAN       | 102 kDa | 0.02 | 0.00 | 0.00 | 0.01 | 0.00 | 0.00 | 15  | 0  | 0  | 12  | 0   | 0   | 2 | 0 | 0 | 2 | 0 | 0 | 3.20%  | 0      | 0      | 3.20%  | 0      | 0      |       |
| 205 | Nucleosome assembly protein 1-like 4                                    | FAT1_HUMAN        | 506 kDa | 0.00 | 0.00 | 0.00 | 0.00 | 0.00 | 0.00 | 0   | 0  | 0  | 5   | 0   | 5   | 0 | 0 | 0 | 2 | 0 | 2 | 0      | 0      | 0      | 0      | 0.55%  | 0      | 0.55% |
| 206 | Pleckstrin                                                              | ACTBL_HUMAN       | 42 kDa  | 0.00 | 0.00 | 0.01 | 0.00 | 0.01 | 0.00 | 0   | 0  | 50 | 0   | 75  | 0   | 0 | 0 | 2 | 0 | 3 | 0 | 0      | 0      | 16.00% | 0      | 18.10% | 0      |       |
| 207 | Coagulation factor X                                                    | NP1L4_HUMAN       | 43 kDa  | 0.01 | 0.00 | 0.00 | 0.05 | 0.00 | 0.02 | 5   | 0  | 0  | 27  | 0   | 11  | 3 | 0 | 0 | 4 | 0 | 2 | 11.70% | 0      | 0      | 16.00% | 0      | 11.50% |       |
| 208 | Cofilin-1                                                               | PLEK_HUMAN        | 40 kDa  | 0.02 | 0.03 | 0.03 | 0.04 | 0.03 | 0.02 | 9   | 6  | 7  | 19  | 12  | 9   | 2 | 2 | 2 | 3 | 3 | 3 | 7.43%  | 7.43%  | 7.43%  | 11.70% | 11.70% | 11.70% |       |
| 209 | Hornerin                                                                | FA10_HUMAN        | 55 kDa  | 0.00 | 0.00 | 0.00 | 0.00 | 0.02 | 0.00 | 0   | 0  | 0  | 0   | 10  | 0   | 0 | 0 | 0 | 0 | 2 | 0 | 0      | 0      | 0      | 0      | 0      | 4.10%  | 0     |
| 210 | 26S protease regulatory subunit 6B                                      | E9PK25_HUMAN      | 23 kDa  | 0.00 | 0.08 | 0.12 | 0.00 | 0.10 | 0.05 | 0   | 11 | 16 | 0   | 24  | 11  | 0 | 3 | 3 | 0 | 4 | 2 | 0      | 22.10% | 22.10% | 0      | 28.90% | 22.10% |       |
| 211 | Cathepsin B                                                             | HORN_HUMAN        | 282 kDa | 0.00 | 0.00 | 0.00 | 0.00 | 0.00 | 0.00 | 14  | 0  | 0  | 14  | 8   | 4   | 4 | 0 | 0 | 2 | 2 | 3 | 2.63%  | 0      | 0      | 1.23%  | 1.23%  | 1.72%  |       |
| 212 | Galactokinase                                                           | PRS6B_HUMAN       | 47 kDa  | 0.04 | 0.00 | 0.00 | 0.04 | 0.01 | 0.04 | 18  | 0  | 0  | 22  | 5   | 20  | 3 | 0 | 0 | 3 | 2 | 3 | 20.10% | 0      | 0      | 20.80% | 12.40% | 20.80% |       |
| 213 | Tubulin beta-4A chain                                                   | CATB_HUMAN        | 38 kDa  | 0.08 | 0.00 | 0.00 | 0.01 | 0.00 | 0.00 | 29  | 0  | 0  | 6   | 0   | 0   | 4 | 0 | 0 | 3 | 0 | 0 | 15.30% | 0      | 0      | 12.40% | 0      | 0      |       |
| 214 | Elongation factor 1-delta                                               | GALK1_HUMAN       | 42 kDa  | 0.00 | 0.00 | 0.03 | 0.00 | 0.02 | 0.03 | 0   | 0  | 7  | 0   | 8   | 12  | 0 | 0 | 2 | 0 | 2 | 2 | 0      | 0      | 6.12%  | 0      | 6.12%  | 6.12%  |       |
| 215 | Complement component C8 beta chain                                      | TBB4A_HUMAN       | 50 kDa  | 0.02 | 0.00 | 0.02 | 0.03 | 0.03 | 0.03 | 102 | 0  | 81 | 155 | 144 | 130 | 3 | 0 | 2 | 3 | 2 | 3 | 51.60% | 0      | 52.90% | 60.40% | 58.10% | 56.50% |       |
| 216 | Stress-induced-phosphoprotein 1                                         | EF1D_HUMAN        | 31 kDa  | 0.04 | 0.00 | 0.00 | 0.04 | 0.01 | 0.00 | 11  | 0  | 0  | 14  | 4   | 0   | 2 | 0 | 0 | 2 | 2 | 0 | 8.54%  | 0      | 0      | 8.54%  | 8.54%  | 0      |       |
| 217 | Purine nucleoside phosphorylase                                         | CO8B_HUMAN        | 67 kDa  | 0.03 | 0.00 | 0.00 | 0.01 | 0.00 | 0.00 | 17  | 0  | 0  | 9   | 0   | 0   | 3 | 0 | 0 | 0 | 2 | 0 | 0      | 5.58%  | 0      | 0      | 5.58%  | 0      | 0     |
| 218 | ADP-ribosylation factor 1                                               | STIP1_HUMAN       | 63 kDa  | 0.00 | 0.00 | 0.00 | 0.01 | 0.00 | 0.00 | 0   | 0  | 0  | 4   | 0   | 0   | 0 | 0 | 0 | 0 | 2 | 0 | 0      | 0      | 0      | 0      | 4.24%  | 0      | 0     |
| 219 | Proteasome activator complex subunit 2                                  | PNPH_HUMAN        | 32 kDa  | 0.00 | 0.00 | 0.00 | 0.07 | 0.03 | 0.02 | 0   | 0  | 0  | 26  | 11  | 6   | 0 | 0 | 0 | 7 | 4 | 2 | 0      | 0      | 0      | 37.70% | 13.10% | 9.34%  |       |
| 220 | Cell division control protein 42 homolog                                | ARF1_HUMAN (+1)   | 21 kDa  | 0.04 | 0.00 | 0.00 | 0.11 | 0.00 | 0.00 | 7   | 0  | 0  | 27  | 0   | 0   | 3 | 0 | 0 | 5 | 0 | 0 | 19.90% | 0      | 0      | 37.60% | 0      | 0      |       |
| 221 | Protein disulfide-isomerase                                             | PSME2_HUMAN       | 27 kDa  | 0.00 | 0.02 | 0.01 | 0.06 | 0.10 | 0.00 | 0   | 3  | 2  | 18  | 27  | 0   | 0 | 2 | 2 | 4 | 4 | 4 | 0      | 0      | 14.60% | 14.60% | 21.30% | 21.30% | 0     |
| 222 | Fructose-1,6-bisphosphatase 1                                           | CDC42_HUMAN       | 21 kDa  | 0.00 | 0.00 | 0.00 | 0.00 | 0.05 | 0.00 | 0   | 0  | 0  | 0   | 10  | 0   | 0 | 0 | 0 | 0 | 2 | 0 | 0      | 0      | 0      | 0      | 15.70% | 0      |       |
| 223 | Proteasome subunit alpha type-4                                         | PDIA1_HUMAN       | 57 kDa  | 0.01 | 0.00 | 0.00 | 0.03 | 0.02 | 0.01 | 8   | 0  | 0  | 18  | 11  | 7   | 2 | 0 | 0 | 7 | 2 | 2 | 8.27%  | 0      | 0      | 22.40% | 8.27%  | 8.27%  |       |
| 224 | Integrin beta-1                                                         | F16P1_HUMAN       | 37 kDa  | 0.00 | 0.00 | 0.00 | 0.00 | 0.04 | 0.04 | 0   | 0  | 0  | 0   | 16  | 15  | 0 | 0 | 0 | 0 | 2 | 2 | 0      | 0      | 0      | 0      | 8.28%  | 8.28%  |       |
| 225 | Capping protein (Actin filament) muscle Z-line, beta, isoform           | PSA4_HUMAN        | 29 kDa  | 0.07 | 0.00 | 0.00 | 0.03 | 0.00 | 0.00 | 21  | 0  | 0  | 11  | 0   | 0   | 6 | 0 | 0 | 3 | 0 | 0 | 16.50% | 0      | 0      | 12.30% | 0      | 0      |       |
| 226 | CRA_a                                                                   | ITB1_HUMAN        | 88 kDa  | 0.00 | 0.00 | 0.00 | 0.01 | 0.00 | 0.01 | 0   | 0  | 0  | 3   | 1   | 5   | 0 | 0 | 0 | 2 | 2 | 4 | 0      | 0      | 0      | 1.13%  | 1.13%  | 4.64%  |       |
| 227 | Heterogeneous nuclear ribonucleoprotein H                               | B1AK87_HUMAN (+1) | 29 kDa  | 0.00 | 0.00 | 0.00 | 0.01 | 0.00 | 0.00 | 0   | 0  | 0  | 5   | 0   | 0   | 0 | 0 | 0 | 4 | 0 | 0 | 0      | 0      | 0      | 0      | 18.10% | 0      | 0     |
| 228 | Cathepsin L1                                                            | G8JLB6_HUMAN      | 51 kDa  | 0.03 | 0.00 | 0.00 | 0.03 | 0.00 | 0.03 | 14  | 0  | 0  | 18  | 0   | 18  | 2 | 0 | 0 | 6 | 0 | 3 | 6.99%  | 0      | 0      | 12.70% | 0      | 7.20%  |       |
| 229 | Tubulin beta-1 chain                                                    | CATL1_HUMAN       | 38 kDa  | 0.00 | 0.00 | 0.00 | 0.02 | 0.00 | 0.00 | 0   | 0  | 0  | 9   | 0   | 0   | 0 | 0 | 0 | 3 | 0 | 0 | 0      | 0      | 0      | 0      | 10.80% | 0      | 0     |
| 230 | HLA class I histocompatibility antigen, A-2 alpha chain                 | TBB1_HUMAN        | 50 kDa  | 0.02 | 0.00 | 0.00 | 0.00 | 0.00 | 0.00 | 26  | 0  | 0  | 0   | 0   | 0   | 2 | 0 | 0 | 0 | 0 | 0 | 12.20% | 0      | 0      | 0      | 0      | 0      |       |
| 231 | Annexin A5                                                              | 1A02_HUMAN        | 41 kDa  | 0.02 | 0.00 | 0.00 | 0.03 | 0.02 | 0.00 | 9   | 0  | 0  | 14  | 7   | 0   | 3 | 0 | 0 | 3 | 2 | 0 | 12.90% | 0      | 0      | 15.10% | 10.40% | 0      |       |
| 232 | Hypoxia up-regulated protein 1                                          | ANXA5_HUMAN       | 36 kDa  | 0.06 | 0.00 | 0.00 | 0.04 | 0.00 | 0.00 | 22  | 0  | 0  | 17  | 0   | 0   | 5 | 0 | 0 | 4 | 0 | 0 | 16.20% | 0      | 0      | 11.60% | 0      | 0      |       |
| 233 | Beta-hexosaminidase subunit beta                                        | HYOU1_HUMAN       | 111 kDa | 0.00 | 0.00 | 0.00 | 0.01 | 0.00 | 0.00 | 0   | 0  | 0  | 10  | 0   | 3   | 0 | 0 | 0 | 4 | 0 | 2 | 0      | 0      | 0      | 7.21%  | 0      | 3.90%  |       |
| 234 | Cytosolic non-specific dipeptidase                                      | HEXB_HUMAN        | 63 kDa  | 0.03 | 0.00 | 0.00 | 0.01 | 0.00 | 0.00 | 18  | 0  | 0  | 7   | 0   | 0   | 3 | 0 | 0 | 3 | 0 | 0 | 6.12%  | 0      | 0      | 6.12%  | 0      | 0      |       |
| 235 | Alanine-tRNA ligase, cytoplasmic                                        | CNDP2_HUMAN       | 53 kDa  | 0.00 | 0.02 | 0.03 | 0.01 | 0.02 | 0.02 | 0   | 5  | 8  | 4   | 12  | 9   | 0 | 2 | 2 | 2 | 4 | 2 | 0      | 5.89%  | 5.89%  | 5.89%  | 12.40% | 5.89%  |       |
| 236 | Keratin, type II cytoskeletal 6A                                        | SYAC_HUMAN        | 107 kDa | 0.00 | 0.00 | 0.00 | 0.01 | 0.01 | 0.01 | 0   | 0  | 0  | 8   | 6   | 8   | 0 | 0 | 0 | 3 | 3 | 3 | 0      | 0      | 0      | 6.20%  | 6.71%  | 6.71%  |       |
| 237 | Keratin, type II cytoskeletal 1b                                        | K2C6A_HUMAN       | 60 kDa  | 0.03 | 0.00 | 0.00 | 0.00 | 0.00 | 0.01 | 90  | 0  | 0  | 0   | 0   | 47  | 6 | 0 | 0 | 0 | 0 | 2 | 23.90% | 0      | 0      | 0      | 0      | 15.40% |       |
| 238 | Cytosolic 10-formyltetrahydrofolate dehydrogenase                       | AL1L1_HUMAN       | 99 kDa  | 0.00 | 0.00 | 0.00 | 0.00 | 0.00 | 0.01 | 0   | 0  | 0  | 0   | 0   | 7   | 0 | 0 | 0 | 0 | 0 | 3 | 0      | 0      | 0      | 0      | 0      | 3.22%  |       |
| 239 | Septin-2                                                                | SEPT2_HUMAN       | 41 kDa  | 0.02 | 0.00 | 0.00 | 0.02 | 0.02 | 0.01 | 7   | 0  | 0  | 11  | 9   | 6   | 3 | 0 | 0 | 3 | 2 | 2 | 16.30% | 0      | 0      | 12.50% | 9.14%  | 9.14%  |       |
| 240 | 40S ribosomal protein S3                                                | E9PLO9_HUMAN (+1) | 25 kDa  | 0.03 | 0.00 | 0.00 | 0.04 | 0.03 | 0.03 | 7   | 0  | 0  | 14  | 8   | 9   | 2 | 0 | 0 | 4 | 2 | 2 | 12.60% | 0      | 0      | 20.80% | 12.60% | 12.60% |       |
| 241 | A disintegrin and metalloproteinase with thrombospondin motifs 13       | ATS13_HUMAN       | 154 kDa | 0.00 | 0.00 | 0.00 | 0.00 | 0.00 | 0.00 | 4   | 0  | 0  | 4   | 0   | 0   | 2 | 0 | 0 | 2 | 0 | 0 | 1.33%  | 0      | 0      | 1.33%  | 0      | 0      |       |
| 242 | Keratin, type II cytoskeletal 1b                                        | K2C1B_HUMAN       | 62 kDa  | 0.01 | 0.00 | 0.00 | 0.00 | 0.00 | 0.01 | 30  | 0  | 0  | 0   | 0   | 21  | 3 | 0 | 0 | 0 | 0 | 2 | 12.60% | 0      | 0      | 0      | 0      | 6.23%  |       |

|                                                   |                                                                  |                   |         |      |      |      |      |      |      |    |    |    |    |    |    |   |   |   |   |   |   |        |        |        |        |        |        |        |        |   |
|---------------------------------------------------|------------------------------------------------------------------|-------------------|---------|------|------|------|------|------|------|----|----|----|----|----|----|---|---|---|---|---|---|--------|--------|--------|--------|--------|--------|--------|--------|---|
| 26S protease regulatory subunit                   |                                                                  |                   |         |      |      |      |      |      |      |    |    |    |    |    |    |   |   |   |   |   |   |        |        |        |        |        |        |        |        |   |
| 243                                               | 6A                                                               | PR56A_HUMAN       | 49 kDa  | 0.01 | 0.00 | 0.00 | 0.02 | 0.00 | 0.02 | 6  | 0  | 0  | 11 | 0  | 9  | 2 | 0 | 0 | 3 | 0 | 3 | 7.06%  | 0      | 0      | 14.60% | 0      | 12.10% |        |        |   |
| 244                                               | Septin-7                                                         | E7EPK1_HUMAN (+2) | 51 kDa  | 0.03 | 0.00 | 0.00 | 0.01 | 0.00 | 0.01 | 16 | 0  | 0  | 8  | 0  | 5  | 2 | 0 | 0 | 3 | 0 | 2 | 7.55%  | 0      | 0      | 11.40% | 0      | 4.35%  |        |        |   |
| 245                                               | Coronin-1C                                                       | COR1C_HUMAN       | 53 kDa  | 0.00 | 0.00 | 0.00 | 0.02 | 0.03 | 0.02 | 0  | 0  | 0  | 14 | 14 | 11 | 0 | 0 | 0 | 4 | 2 | 2 | 0      | 0      | 0      | 14.30% | 8.23%  | 8.23%  |        |        |   |
| 246                                               | Peroxiredoxin-1 (Fragment)                                       | A0A0A0MSI0_HUMAN  | 19 kDa  | 0.00 | 0.00 | 0.03 | 0.02 | 0.08 | 0.00 | 0  | 0  | 3  | 5  | 15 | 0  | 0 | 0 | 2 | 2 | 3 | 0 | 0      | 0      | 11.70% | 11.70% | 16.40% | 0      |        |        |   |
| 247                                               | UDP-glucose 6-dehydrogenase                                      | UGDH_HUMAN        | 55 kDa  | 0.00 | 0.00 | 0.00 | 0.00 | 0.01 | 0.02 | 0  | 0  | 0  | 3  | 8  | 11 | 0 | 0 | 0 | 2 | 2 | 3 | 0      | 0      | 0      | 6.88%  | 6.88%  | 9.51%  |        |        |   |
| 248                                               | EMILIN-2                                                         | EMILIN2_HUMAN     | 116 kDa | 0.01 | 0.00 | 0.00 | 0.00 | 0.00 | 0.00 | 13 | 0  | 0  | 0  | 0  | 4  | 0 | 0 | 0 | 0 | 0 | 0 | 8.45%  | 0      | 0      | 0      | 0      | 0      |        |        |   |
| 249                                               | Zyxin (Fragment)                                                 | HOV2Y8_HUMAN (+1) | 58 kDa  | 0.00 | 0.00 | 0.00 | 0.01 | 0.01 | 0.00 | 0  | 0  | 0  | 4  | 6  | 3  | 0 | 0 | 0 | 2 | 3 | 2 | 0      | 0      | 0      | 7.59%  | 11.10% | 8.70%  |        |        |   |
| 250                                               | WD repeat-containing protein 1 Putative Ras-related protein Rab- | WDR1_HUMAN        | 66 kDa  | 0.00 | 0.00 | 0.00 | 0.01 | 0.00 | 0.00 | 0  | 0  | 0  | 9  | 0  | 0  | 0 | 0 | 0 | 2 | 0 | 0 | 0      | 0      | 0      | 0      | 3.80%  | 0      | 0      |        |   |
| 251                                               | 1C Vasodilator-stimulated                                        | RAB1C_HUMAN       | 22 kDa  | 0.00 | 0.00 | 0.00 | 0.04 | 0.00 | 0.00 | 0  | 0  | 0  | 8  | 0  | 0  | 0 | 0 | 0 | 4 | 0 | 0 | 0      | 0      | 0      | 0      | 13.40% | 0      | 0      |        |   |
| 252                                               | phosphoprotein                                                   | VASP_HUMAN        | 40 kDa  | 0.00 | 0.00 | 0.00 | 0.02 | 0.00 | 0.00 | 0  | 0  | 0  | 9  | 0  | 0  | 0 | 0 | 0 | 2 | 0 | 0 | 0      | 0      | 0      | 0      | 7.63%  | 0      | 0      |        |   |
| 253                                               | 26S proteasome non-ATPase regulatory subunit 3                   | PSMD3_HUMAN       | 61 kDa  | 0.02 | 0.00 | 0.00 | 0.02 | 0.00 | 0.00 | 10 | 0  | 0  | 11 | 0  | 0  | 2 | 0 | 0 | 2 | 0 | 0 | 0      | 4.87%  | 0      | 0      | 4.87%  | 0      | 0      |        |   |
| 254                                               | Proteasome subunit alpha type-5                                  | PSA5_HUMAN        | 26 kDa  | 0.08 | 0.00 | 0.00 | 0.04 | 0.00 | 0.00 | 21 | 0  | 0  | 13 | 0  | 0  | 4 | 0 | 0 | 4 | 0 | 0 | 0      | 24.10% | 0      | 0      | 24.10% | 0      | 0      |        |   |
| 255                                               | Galectin-3-binding protein                                       | LG3BP_HUMAN       | 65 kDa  | 0.03 | 0.00 | 0.00 | 0.00 | 0.00 | 0.00 | 22 | 0  | 0  | 0  | 0  | 0  | 6 | 0 | 0 | 0 | 0 | 0 | 0      | 12.30% | 0      | 0      | 0      | 0      | 0      |        |   |
| 256                                               | 26S proteasome non-ATPase regulatory subunit 11                  | PSD11_HUMAN       | 47 kDa  | 0.02 | 0.00 | 0.00 | 0.01 | 0.00 | 0.02 | 11 | 0  | 0  | 7  | 0  | 8  | 3 | 0 | 0 | 3 | 0 | 2 | 0      | 8.53%  | 0      | 0      | 8.06%  | 0      | 5.92%  |        |   |
| 257                                               | Tyrosine--tRNA ligase, cytoplasmic                               | SYYC_HUMAN        | 59 kDa  | 0.00 | 0.00 | 0.00 | 0.01 | 0.02 | 0.02 | 0  | 0  | 0  | 5  | 9  | 11 | 0 | 0 | 0 | 2 | 2 | 2 | 0      | 0      | 0      | 6.63%  | 6.25%  | 6.25%  |        |        |   |
| 258                                               | Calreticulin                                                     | CALR_HUMAN        | 48 kDa  | 0.00 | 0.00 | 0.00 | 0.02 | 0.01 | 0.02 | 0  | 0  | 0  | 9  | 7  | 10 | 0 | 0 | 0 | 2 | 2 | 2 | 0      | 0      | 0      | 0      | 15.60% | 15.60% | 15.60% |        |   |
| 259                                               | Coatmer subunit beta                                             | COPB_HUMAN        | 107 kDa | 0.00 | 0.00 | 0.00 | 0.00 | 0.00 | 0.00 | 0  | 0  | 0  | 2  | 0  | 0  | 0 | 0 | 0 | 2 | 0 | 0 | 0      | 0      | 0      | 0      | 3.78%  | 0      | 0      |        |   |
| 260                                               | Spliceosome RNA helicase DDX39B                                  | DX39B_HUMAN       | 49 kDa  | 0.00 | 0.00 | 0.00 | 0.03 | 0.03 | 0.02 | 0  | 0  | 0  | 20 | 14 | 9  | 0 | 0 | 0 | 3 | 3 | 3 | 0      | 0      | 0      | 0      | 8.41%  | 8.41%  | 8.41%  |        |   |
| 261                                               | Proteasome subunit beta type-6                                   | PSB6_HUMAN        | 25 kDa  | 0.02 | 0.00 | 0.00 | 0.01 | 0.00 | 0.00 | 5  | 0  | 0  | 4  | 0  | 0  | 2 | 0 | 0 | 2 | 0 | 0 | 0      | 8.79%  | 0      | 0      | 8.79%  | 0      | 0      |        |   |
| 262                                               | Thyroxine-binding globulin                                       | THBG_HUMAN        | 46 kDa  | 0.01 | 0.03 | 0.00 | 0.00 | 0.00 | 0.00 | 5  | 9  | 0  | 0  | 0  | 0  | 2 | 2 | 0 | 0 | 0 | 0 | 0      | 4.82%  | 4.82%  | 0      | 0      | 0      | 0      |        |   |
| 263                                               | Protein C1QTNF3-AMACR                                            | E9PGA6_HUMAN      | 31 kDa  | 0.00 | 0.05 | 0.00 | 0.00 | 0.00 | 0.00 | 0  | 9  | 0  | 0  | 0  | 0  | 0 | 0 | 0 | 0 | 0 | 0 | 0      | 8.45%  | 0      | 0      | 0      | 0      | 0      |        |   |
| 264                                               | Collagen alpha-1(V) chain                                        | COS1_HUMAN        | 184 kDa | 0.00 | 0.00 | 0.01 | 0.00 | 0.00 | 0.00 | 0  | 3  | 7  | 0  | 0  | 0  | 2 | 2 | 0 | 0 | 0 | 0 | 0      | 2.12%  | 2.23%  | 0      | 0      | 0      |        |        |   |
| 265                                               | Ig heavy chain V-III region HIL                                  | HV310_HUMAN       | 14 kDa  | 0.00 | 0.00 | 0.00 | 0.02 | 0.00 | 0.00 | 0  | 0  | 0  | 4  | 0  | 0  | 0 | 0 | 0 | 3 | 0 | 0 | 0      | 0      | 0      | 0      | 12.40% | 0      | 0      |        |   |
| 266                                               | Cathepsin Z                                                      | CATZ_HUMAN        | 34 kDa  | 0.00 | 0.00 | 0.00 | 0.03 | 0.00 | 0.03 | 0  | 0  | 0  | 0  | 12 | 0  | 0 | 0 | 0 | 0 | 3 | 0 | 0      | 0      | 0      | 0      | 0      | 8.91%  | 0      |        |   |
| 267                                               | Neutral alpha-glucosidase AB                                     | GANAB_HUMAN       | 107 kDa | 0.00 | 0.00 | 0.00 | 0.01 | 0.00 | 0.00 | 5  | 0  | 0  | 18 | 0  | 5  | 4 | 0 | 0 | 6 | 0 | 3 | 6.78%  | 0      | 0      | 9.53%  | 0      | 5.40%  |        |        |   |
| 26S protease regulatory subunit                   |                                                                  |                   |         |      |      |      |      |      |      |    |    |    |    |    |    |   |   |   |   |   |   |        |        |        |        |        |        |        |        |   |
| 268                                               | 8                                                                | PRS8_HUMAN        | 46 kDa  | 0.03 | 0.00 | 0.00 | 0.02 | 0.00 | 0.02 | 13 | 0  | 0  | 12 | 0  | 7  | 3 | 0 | 0 | 3 | 0 | 3 | 12.30% | 0      | 0      | 12.60% | 0      | 12.60% |        |        |   |
| 269                                               | Lupus La protein                                                 | LA_HUMAN          | 47 kDa  | 0.00 | 0.00 | 0.00 | 0.03 | 0.02 | 0.02 | 0  | 0  | 0  | 14 | 9  | 11 | 0 | 0 | 0 | 3 | 4 | 3 | 0      | 0      | 0      | 5.88%  | 12.50% | 9.07%  |        |        |   |
| 270                                               | Haptoglobin                                                      | A0A087WU08_HUMAN  | 31 kDa  | 0.04 | 0.00 | 0.00 | 0.03 | 0.00 | 0.00 | 12 | 0  | 0  | 10 | 0  | 0  | 2 | 0 | 0 | 2 | 0 | 0 | 6.05%  | 0      | 0      | 6.05%  | 0      | 0      |        |        |   |
| 271                                               | Keratin, type II cytoskeletal 4                                  | K2C4_HUMAN        | 57 kDa  | 0.00 | 0.07 | 0.00 | 0.00 | 0.00 | 0.00 | 0  | 26 | 0  | 0  | 0  | 0  | 0 | 7 | 0 | 0 | 0 | 0 | 0      | 0      | 0      | 17.00% | 0      | 0      | 0      |        |   |
| 272                                               | Myosin light polypeptide 6                                       | G8JLA2_HUMAN (+1) | 17 kDa  | 0.01 | 0.00 | 0.00 | 0.01 | 0.00 | 0.00 | 2  | 0  | 0  | 2  | 0  | 0  | 2 | 0 | 0 | 2 | 0 | 0 | 0      | 19.10% | 0      | 0      | 19.10% | 0      | 0      |        |   |
| 273                                               | Cytoplasmic aconitate hydratase                                  | ACOC_HUMAN        | 98 kDa  | 0.00 | 0.00 | 0.00 | 0.00 | 0.00 | 0.01 | 0  | 0  | 0  | 0  | 0  | 14 | 0 | 0 | 0 | 0 | 0 | 0 | 0      | 0      | 0      | 0      | 0      | 0      | 0      | 3.71%  |   |
| 26S proteasome non-ATPase regulatory subunit 14   |                                                                  |                   |         |      |      |      |      |      |      |    |    |    |    |    |    |   |   |   |   |   |   |        |        |        |        |        |        |        |        |   |
| 274                                               | General vesicular transport factor p115                          | PSDE_HUMAN        | 35 kDa  | 0.03 | 0.00 | 0.00 | 0.02 | 0.01 | 0.00 | 9  | 0  | 0  | 7  | 5  | 0  | 2 | 0 | 0 | 3 | 2 | 0 | 0      | 19.40% | 0      | 0      | 19.40% | 19.40% | 0      |        |   |
| 275                                               | Argininosuccinate lyase                                          | ARLY_HUMAN        | 52 kDa  | 0.00 | 0.00 | 0.00 | 0.00 | 0.00 | 0.01 | 0  | 0  | 0  | 0  | 0  | 5  | 0 | 0 | 0 | 0 | 0 | 2 | 0      | 0      | 0      | 0      | 0      | 0      | 3.12%  | 0      | 0 |
| 276                                               | Myosin-4                                                         | MYH4_HUMAN        | 223 kDa | 0.00 | 0.00 | 0.00 | 0.00 | 0.00 | 0.00 | 0  | 0  | 0  | 0  | 0  | 1  | 0 | 0 | 0 | 0 | 0 | 2 | 0      | 0      | 0      | 0      | 0      | 0      | 0      | 0.62%  |   |
| Non-POU domain-containing octamer-binding protein |                                                                  |                   |         |      |      |      |      |      |      |    |    |    |    |    |    |   |   |   |   |   |   |        |        |        |        |        |        |        |        |   |
| 277                                               | Kynureinase                                                      | KYNU_HUMAN        | 52 kDa  | 0.00 | 0.00 | 0.00 | 0.03 | 0.04 | 0.00 | 0  | 0  | 0  | 16 | 20 | 0  | 0 | 0 | 0 | 4 | 4 | 0 | 0      | 0      | 0      | 0      | 12.70% | 12.70% | 0      | 11.50% |   |
| 278                                               | Proteasome subunit beta type-10                                  | PSB10_HUMAN       | 29 kDa  | 0.08 | 0.00 | 0.00 | 0.00 | 0.00 | 0.00 | 24 | 0  | 0  | 0  | 0  | 0  | 3 | 0 | 0 | 0 | 0 | 0 | 0      | 19.40% | 0      | 0      | 0      | 0      | 0      |        |   |
| 281                                               | Amyloid-like protein 2                                           | APLP2_HUMAN       | 87 kDa  | 0.01 | 0.01 | 0.00 | 0.00 | 0.00 | 0.00 | 11 | 3  | 0  | 0  | 0  | 0  | 3 | 2 | 0 | 0 | 0 | 0 | 0      | 4.19%  | 4.19%  | 0      | 0      | 0      | 0      |        |   |
| 282                                               | Neuropilin-1                                                     | E9PEP6_HUMAN (+1) | 101 kDa | 0.00 | 0.00 | 0.00 | 0.00 | 0.00 | 0.01 | 0  | 0  | 0  | 0  | 0  | 7  | 0 | 0 | 0 | 0 | 2 | 0 | 0      | 0      | 0      | 0      | 0      | 0      | 4.08%  |        |   |
| 283                                               | 14-3-3 protein beta/alpha                                        | 1433B_HUMAN       | 28 kDa  | 0.00 | 0.00 | 0.06 | 0.00 | 0.05 | 0.00 | 0  | 0  | 21 | 0  | 32 | 0  | 0 | 0 | 3 | 0 | 3 | 0 | 0      | 0      | 0      | 17.50% | 0      | 21.10% | 0      |        |   |
| 284                                               | Actin-related protein 2/3 complex subunit 3                      | ARPC3_HUMAN       | 21 kDa  | 0.06 | 0.00 | 0.00 | 0.00 | 0.00 | 0.00 | 12 | 0  | 0  | 0  | 0  | 0  | 2 | 0 | 0 | 0 | 0 | 0 | 0      | 13.50% | 0      | 0      | 0      | 0      | 0      |        |   |
| 285                                               | Integrin-linked protein kinase D-3-phosphoglycerate              | A0A0A0MTH3_HUMAN  | 55 kDa  | 0.01 | 0.00 | 0.00 | 0.01 | 0.00 | 0.00 | 3  | 0  | 0  | 7  | 0  | 0  | 3 | 0 | 0 | 4 | 0 | 0 | 0      | 6.63%  | 0      | 0      | 9.52%  | 0      | 0      |        |   |
| 286                                               | dehydrogenase                                                    | SERA_HUMAN        | 57 kDa  | 0.00 | 0.00 | 0.00 | 0.01 | 0.00 | 0.00 | 0  | 0  | 0  | 7  | 0  | 0  | 0 | 0 | 0 | 2 | 0 | 0 | 0      | 0      | 0      | 0      | 4.32%  | 0      | 0      |        |   |
| 26S protease regulatory subunit                   |                                                                  |                   |         |      |      |      |      |      |      |    |    |    |    |    |    |   |   |   |   |   |   |        |        |        |        |        |        |        |        |   |
| 287                                               | 4                                                                | PRS4_HUMAN        | 49 kDa  | 0.00 | 0.00 | 0.00 | 0.00 | 0.00 | 0.01 | 0  | 0  | 0  | 0  | 0  | 6  | 0 | 0 | 0 | 0 | 0 | 3 | 0      | 0      | 0      | 0      | 0      | 0      | 11.10% |        |   |
| 26S protease regulatory subunit                   |                                                                  |                   |         |      |      |      |      |      |      |    |    |    |    |    |    |   |   |   |   |   |   |        |        |        |        |        |        |        |        |   |
| 288                                               | 10B                                                              | A0A087X2I1_HUMAN  | 46 kDa  | 0.02 | 0.00 | 0.00 | 0.02 | 0.00 | 0.00 | 7  | 0  | 0  | 10 | 0  | 0  | 2 | 0 | 0 | 2 | 0 | 0 | 0      | 7.20%  | 0      | 0      | 7.20%  | 0      | 0      |        |   |
| Interferon-induced GTP-binding protein Mx2        |                                                                  |                   |         |      |      |      |      |      |      |    |    |    |    |    |    |   |   |   |   |   |   |        |        |        |        |        |        |        |        |   |
| 289                                               | Importin-7                                                       | IPO7_HUMAN        | 120 kDa | 0.00 | 0.00 | 0.00 | 0.00 | 0.00 | 0.01 | 0  | 0  | 0  | 21 | 0  | 0  | 0 | 0 | 0 | 3 | 0 | 0 | 0      | 0      | 0      | 0      | 5.17%  | 0      | 0      |        |   |
| 290                                               | 14-3-3 protein theta                                             | 1433T_HUMAN       | 28 kDa  | 0.00 | 0.04 | 0.03 | 0.01 | 0.03 | 0.00 | 0  | 15 | 16 | 15 | 20 | 0  | 0 | 2 | 2 | 2 | 2 | 2 | 0      | 0      | 17.60% | 17.60% | 17.60% | 17.60% | 0      |        |   |
| 292                                               | Exportin-2                                                       | XPO2_HUMAN        | 110 kDa | 0.00 | 0.00 | 0.00 | 0.01 | 0.00 | 0.00 | 0  | 0  | 0  | 13 | 0  | 0  | 0 | 0 | 0 | 2 | 0 | 0 | 0      | 0      | 0      | 0      | 2.68%  | 0      | 0      |        |   |
| 293                                               | Kinectin                                                         | KTN1_HUMAN        | 156 kDa | 0.00 | 0.00 | 0.00 | 0.00 | 0.00 | 0.00 | 0  | 0  | 0  | 5  | 0  | 0  | 0 | 0 | 0 | 3 | 0 | 0 | 0      | 0      | 0      | 0      | 3.68%  | 0      | 0      |        |   |





|                                                           |                               |                   |         |      |      |      |      |      |      |     |   |   |   |   |   |   |   |   |   |   |   |   |        |   |        |        |   |   |
|-----------------------------------------------------------|-------------------------------|-------------------|---------|------|------|------|------|------|------|-----|---|---|---|---|---|---|---|---|---|---|---|---|--------|---|--------|--------|---|---|
| Signal transducer and activator                           |                               |                   |         |      |      |      |      |      |      |     |   |   |   |   |   |   |   |   |   |   |   |   |        |   |        |        |   |   |
| 336                                                       | of transcription 1-alpha/beta | STAT1_HUMAN       | 87 kDa  | 0.00 | 0.00 | 0.00 | 0.00 | 0.00 | 0.00 | 0   | 0 | 0 | 3 | 0 | 0 | 0 | 0 | 0 | 2 | 0 | 0 | 0 | 0      | 0 | 3.33%  | 0      | 0 |   |
| Guanine nucleotide-binding protein G(i)/G(s)/G(t) subunit |                               |                   |         |      |      |      |      |      |      |     |   |   |   |   |   |   |   |   |   |   |   |   |        |   |        |        |   |   |
| 337                                                       | beta-2                        | E7EP32_HUMAN (+1) | 32 kDa  | 0.00 | 0.00 | 0.00 | 0.01 | 0.00 | 0.00 | 0   | 0 | 0 | 3 | 0 | 0 | 0 | 0 | 0 | 2 | 0 | 0 | 0 | 0      | 0 | 6.76%  | 0      | 0 |   |
| Glycogen phosphorylase, brain form                        |                               |                   |         |      |      |      |      |      |      |     |   |   |   |   |   |   |   |   |   |   |   |   |        |   |        |        |   |   |
| 338                                                       |                               | PYGB_HUMAN        | 97 kDa  | 0.00 | 0.00 | 0.00 | 0.00 | 0.00 | 0.00 | 0   | 0 | 0 | 5 | 0 | 0 | 0 | 0 | 0 | 2 | 0 | 0 | 0 | 0      | 0 | 3.44%  | 0      | 0 |   |
| Malate dehydrogenase, mitochondrial                       |                               |                   |         |      |      |      |      |      |      |     |   |   |   |   |   |   |   |   |   |   |   |   |        |   |        |        |   |   |
| 339                                                       |                               | MDHM_HUMAN        | 36 kDa  | 0.00 | 0.00 | 0.00 | 0.01 | 0.00 | 0.00 | 0   | 0 | 0 | 4 | 0 | 0 | 0 | 0 | 0 | 3 | 0 | 0 | 0 | 0      | 0 | 11.20% | 0      | 0 |   |
| Serine--tRNA ligase, cytoplasmic                          |                               |                   |         |      |      |      |      |      |      |     |   |   |   |   |   |   |   |   |   |   |   |   |        |   |        |        |   |   |
| 340                                                       |                               | SYSC_HUMAN        | 59 kDa  | 0.00 | 0.00 | 0.00 | 0.00 | 0.00 | 0.00 | 0   | 0 | 0 | 3 | 0 | 0 | 0 | 0 | 0 | 2 | 0 | 0 | 0 | 0      | 0 | 7.98%  | 0      | 0 |   |
| Procollagen-lysine,2-oxoglutarate 5-dioxygenase 1         |                               |                   |         |      |      |      |      |      |      |     |   |   |   |   |   |   |   |   |   |   |   |   |        |   |        |        |   |   |
| 341                                                       |                               | PLOD1_HUMAN       | 84 kDa  | 0.00 | 0.00 | 0.00 | 0.00 | 0.00 | 0.00 | 2   | 0 | 0 | 0 | 0 | 0 | 2 | 0 | 0 | 0 | 0 | 0 | 0 | 4.26%  | 0 | 0      | 0      | 0 | 0 |
| V-type proton ATPase subunit E 1                          |                               |                   |         |      |      |      |      |      |      |     |   |   |   |   |   |   |   |   |   |   |   |   |        |   |        |        |   |   |
| 342                                                       |                               | VATE1_HUMAN       | 26 kDa  | 0.00 | 0.00 | 0.00 | 0.01 | 0.00 | 0.00 | 0   | 0 | 0 | 4 | 0 | 0 | 0 | 0 | 0 | 3 | 0 | 0 | 0 | 0      | 0 | 15.00% | 0      | 0 |   |
| Serglycin                                                 |                               |                   |         |      |      |      |      |      |      |     |   |   |   |   |   |   |   |   |   |   |   |   |        |   |        |        |   |   |
| 343                                                       |                               | SRGN_HUMAN        | 18 kDa  | 0.02 | 0.00 | 0.00 | 0.00 | 0.00 | 0.00 | 4   | 0 | 0 | 0 | 0 | 0 | 2 | 0 | 0 | 0 | 0 | 0 | 0 | 10.10% | 0 | 0      | 0      | 0 | 0 |
| Neural cell adhesion molecule 1                           |                               |                   |         |      |      |      |      |      |      |     |   |   |   |   |   |   |   |   |   |   |   |   |        |   |        |        |   |   |
| 344                                                       |                               | NCAM1_HUMAN       | 95 kDa  | 0.00 | 0.00 | 0.00 | 0.00 | 0.00 | 0.00 | 0   | 0 | 0 | 0 | 2 | 0 | 0 | 0 | 0 | 0 | 2 | 0 | 0 | 0      | 0 | 0      | 2.91%  | 0 | 0 |
| Proteasome subunit beta type-7                            |                               |                   |         |      |      |      |      |      |      |     |   |   |   |   |   |   |   |   |   |   |   |   |        |   |        |        |   |   |
| 345                                                       |                               | PSB7_HUMAN        | 30 kDa  | 0.01 | 0.00 | 0.00 | 0.00 | 0.00 | 0.00 | 3   | 0 | 0 | 0 | 0 | 0 | 2 | 0 | 0 | 0 | 0 | 0 | 0 | 7.58%  | 0 | 0      | 0      | 0 | 0 |
| ADAM DEC1                                                 |                               |                   |         |      |      |      |      |      |      |     |   |   |   |   |   |   |   |   |   |   |   |   |        |   |        |        |   |   |
| 346                                                       |                               | ADEC1_HUMAN       | 53 kDa  | 0.00 | 0.00 | 0.00 | 0.00 | 0.02 | 0.00 | 0   | 0 | 0 | 0 | 8 | 0 | 0 | 0 | 0 | 2 | 0 | 0 | 0 | 0      | 0 | 0      | 8.72%  | 0 | 0 |
| Protein SET                                               |                               |                   |         |      |      |      |      |      |      |     |   |   |   |   |   |   |   |   |   |   |   |   |        |   |        |        |   |   |
| 347                                                       |                               | SET_HUMAN         | 33 kDa  | 0.00 | 0.00 | 0.00 | 0.00 | 0.02 | 0.00 | 0   | 0 | 0 | 0 | 5 | 0 | 0 | 0 | 0 | 0 | 3 | 0 | 0 | 0      | 0 | 0      | 12.80% | 0 | 0 |
| Obg-like ATPase 1                                         |                               |                   |         |      |      |      |      |      |      |     |   |   |   |   |   |   |   |   |   |   |   |   |        |   |        |        |   |   |
| 348                                                       |                               | J3KQ32_HUMAN (+1) | 47 kDa  | 0.00 | 0.00 | 0.00 | 0.01 | 0.00 | 0.00 | 0   | 0 | 0 | 8 | 0 | 0 | 0 | 0 | 0 | 2 | 0 | 0 | 0 | 0      | 0 | 6.73%  | 0      | 0 |   |
| Desmocollin-1                                             |                               |                   |         |      |      |      |      |      |      |     |   |   |   |   |   |   |   |   |   |   |   |   |        |   |        |        |   |   |
| 349                                                       |                               | DSC1_HUMAN        | 100 kDa | 0.00 | 0.00 | 0.00 | 0.00 | 0.00 | 0.00 | 2   | 0 | 0 | 0 | 0 | 0 | 2 | 0 | 0 | 0 | 0 | 0 | 0 | 3.13%  | 0 | 0      | 0      | 0 | 0 |
| Fascin                                                    |                               |                   |         |      |      |      |      |      |      |     |   |   |   |   |   |   |   |   |   |   |   |   |        |   |        |        |   |   |
| 350                                                       |                               | FSCN1_HUMAN       | 55 kDa  | 0.00 | 0.00 | 0.00 | 0.01 | 0.00 | 0.00 | 0   | 0 | 0 | 4 | 0 | 0 | 0 | 0 | 0 | 2 | 0 | 0 | 0 | 0      | 0 | 6.90%  | 0      | 0 |   |
| Prolactin-inducible protein                               |                               |                   |         |      |      |      |      |      |      |     |   |   |   |   |   |   |   |   |   |   |   |   |        |   |        |        |   |   |
| 351                                                       |                               | PIP_HUMAN         | 17 kDa  | 0.03 | 0.00 | 0.00 | 0.00 | 0.00 | 0.00 | 4   | 0 | 0 | 0 | 0 | 0 | 2 | 0 | 0 | 0 | 0 | 0 | 0 | 17.80% | 0 | 0      | 0      | 0 | 0 |
| Ferritin light chain                                      |                               |                   |         |      |      |      |      |      |      |     |   |   |   |   |   |   |   |   |   |   |   |   |        |   |        |        |   |   |
| 352                                                       |                               | FRIL_HUMAN        | 20 kDa  | 0.00 | 0.00 | 0.00 | 0.00 | 0.02 | 0.00 | 0   | 0 | 0 | 0 | 3 | 0 | 0 | 0 | 0 | 0 | 2 | 0 | 0 | 0      | 0 | 0      | 17.70% | 0 | 0 |
| Reticulocalbin-3 (Fragment)                               |                               |                   |         |      |      |      |      |      |      |     |   |   |   |   |   |   |   |   |   |   |   |   |        |   |        |        |   |   |
| 353                                                       |                               | MOQZHO_HUMAN (+1) | 20 kDa  | 0.00 | 0.00 | 0.02 | 0.00 | 0.00 | 0.00 | 0   | 0 | 2 | 0 | 0 | 0 | 0 | 0 | 2 | 0 | 0 | 0 | 0 | 0      | 0 | 14.80% | 0      | 0 | 0 |
| Keratin, type II cytoskeletal 6B                          |                               |                   |         |      |      |      |      |      |      |     |   |   |   |   |   |   |   |   |   |   |   |   |        |   |        |        |   |   |
| 354                                                       |                               | K2C6B_HUMAN       | 60 kDa  | 0.00 | 0.00 | 0.00 | 0.00 | 0.00 | 0.00 | 114 | 0 | 0 | 0 | 0 | 0 | 2 | 0 | 0 | 0 | 0 | 0 | 0 | 25.70% | 0 | 0      | 0      | 0 | 0 |
| Superoxide dismutase                                      |                               |                   |         |      |      |      |      |      |      |     |   |   |   |   |   |   |   |   |   |   |   |   |        |   |        |        |   |   |
| 355                                                       |                               | A0A0C4DFU2_HUMAN  | 25 kDa  | 0.00 | 0.00 | 0.00 | 0.00 | 0.01 | 0.00 | 0   | 0 | 0 | 0 | 3 | 0 | 0 | 0 | 0 | 0 | 2 | 0 | 0 | 0      | 0 | 0      | 12.60% | 0 | 0 |
| END OF FILE                                               |                               |                   |         |      |      |      |      |      |      |     |   |   |   |   |   |   |   |   |   |   |   |   |        |   |        |        |   |   |

**a**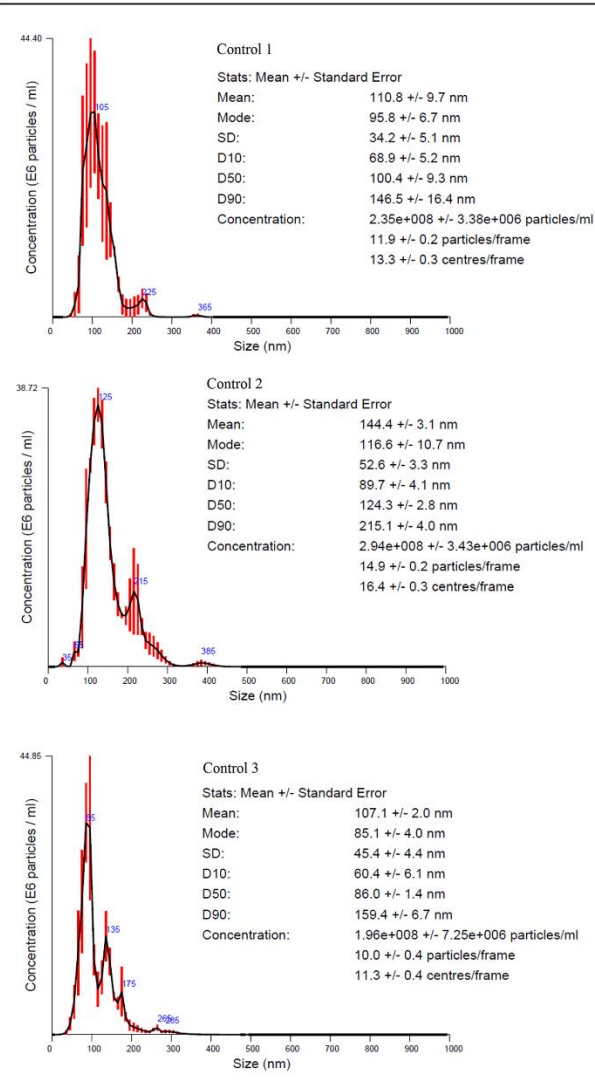**b**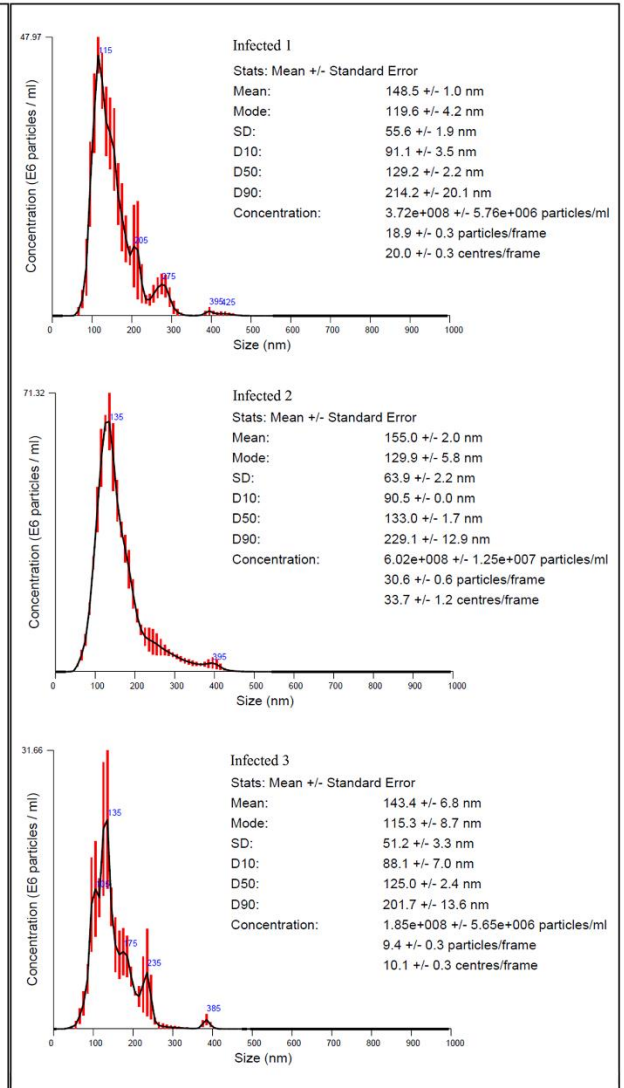

Supplementary Figure 1. Nanoparticle analysis of exosome samples. Representative histograms of each biological replicate of exosome derived from: a. *Mtb*-infected cells and b. Control cells.

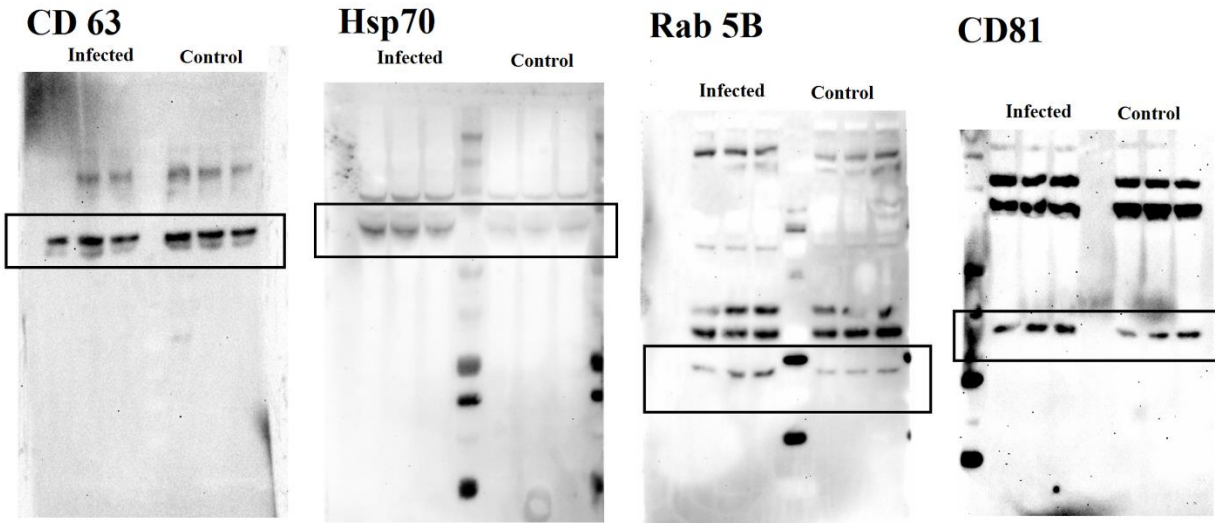

Supplementary Figure 2. Original images of the western blot used in Fig. 1d. Western blot detected using the chemiluminescent substrate Super signal West Pico.

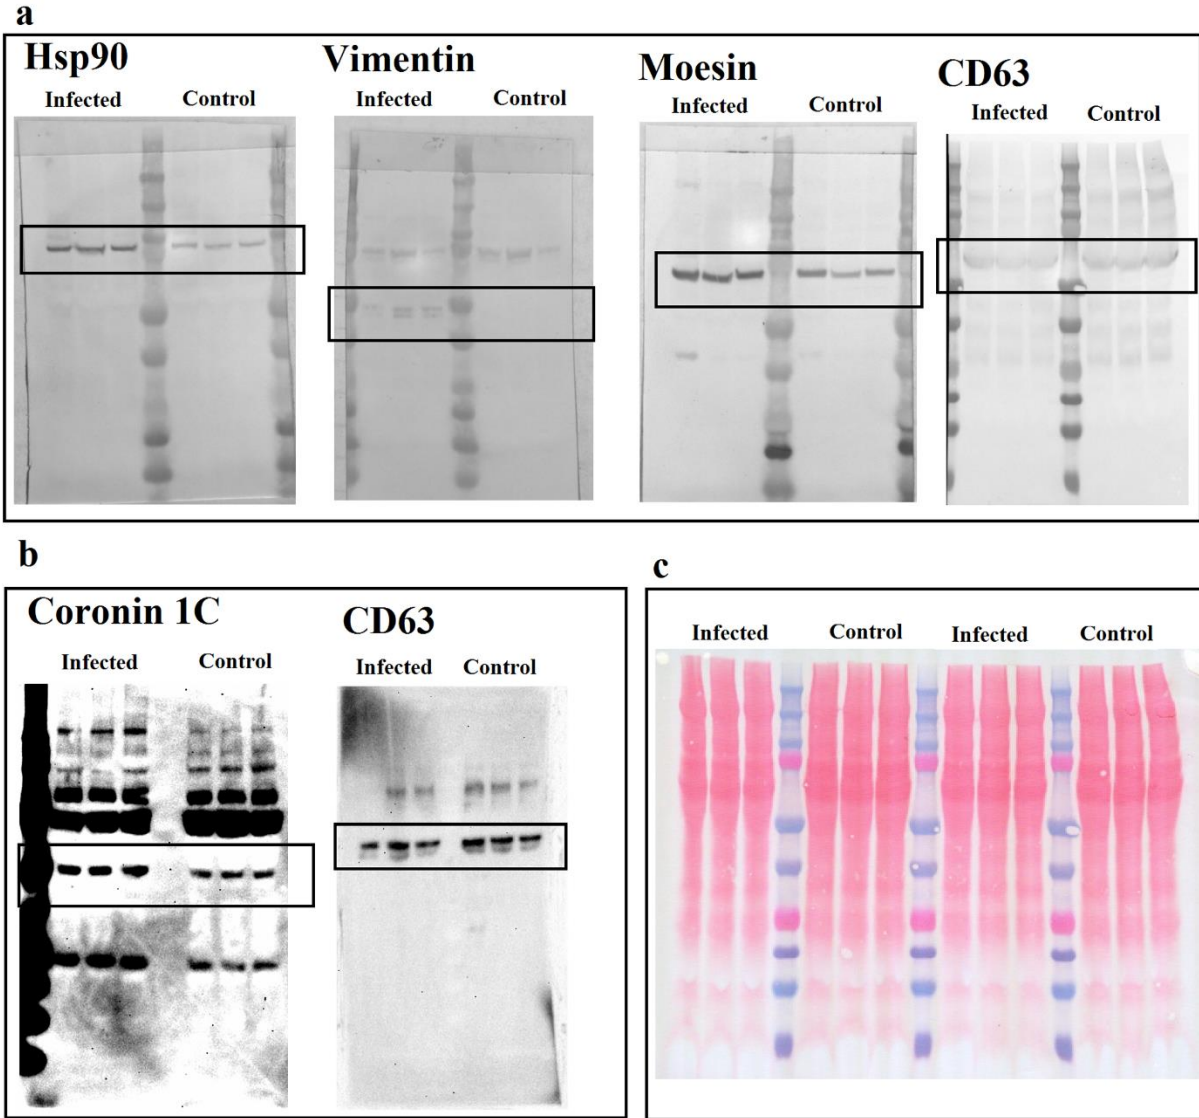

Supplementary Figure 3. Original images of the western blot reported in Figure 3. a) Western blot detected using the chromogenic substrate 4-chloro 1-naphtol. b) Western blot detected using the chemiluminescent substrate Super signal West Pico. c) Membrane for the western blot to detect Hsp70 (left side: infected and control) and CD63 (right side infected and control) the membrane was stained with Ponceau S to show equal protein loading of 50 ug.
